## 1 Transgene directed induction of a stem cell-derived human embryo model

2  
3 Bailey AT Weatherbee<sup>1\*</sup>, Carlos W Gantner<sup>1\*</sup>, Riza M Daza<sup>2</sup>, Nobuhiko Hamazaki<sup>2</sup>, Lisa K.  
4 Iwamoto-Stohl<sup>1</sup>, Jay Shendure<sup>2,3,4,5</sup> & Magdalena Zernicka-Goetz<sup>1,5,6†</sup>.

5  
6 <sup>1</sup>Department of Physiology, Development and Neuroscience, University of Cambridge, Cambridge, UK.

7  
8 <sup>2</sup>Department of Genome Sciences, University of Washington School of Medicine, Seattle, WA, USA.

9  
10 <sup>3</sup>Brotman Baty Institute for Precision Medicine, Seattle, WA, USA.

11  
12 <sup>4</sup>Howard Hughes Medical Institute, Seattle, WA, USA.

13  
14 <sup>5</sup>Allen Discovery Center for Cell Lineage Tracing, USA.

15  
16 <sup>6</sup>Division of Biology and Biological Engineering, California Institute of Technology, Pasadena, CA, USA.

17  
18 \*Equal contribution.

19  
20 †Correspondence and requests for materials should be addressed to M.Z-G.

## 21 22 Abstract

23 **The human embryo undergoes morphogenetic transformations following implantation into**  
24 **the uterus, yet our knowledge of this crucial stage is limited by the inability to observe the**  
25 **embryo *in vivo*. Stem cell-derived models of the embryo are important tools to interrogate**  
26 **developmental events and tissue-tissue crosstalk during these stages<sup>1</sup>. Here, we establish**  
27 **a human post-implantation embryo model comprised of embryonic and extraembryonic**  
28 **tissues. We combine two types of extraembryonic-like cells generated by transcription**  
29 **factor overexpression with wildtype embryonic stem cells and promote their self-**  
30 **organization into structures that mimic aspects of the post-implantation human embryo.**  
31 **These self-organized aggregates contain a pluripotent epiblast-like domain surrounded by**  
32 **hypoblast- and trophoblast-like tissues. We demonstrate that these inducible human**  
33 **embryoids robustly generate several cell types, including amnion, extraembryonic**  
34 **mesenchyme, and primordial germ cell-like cells in response to BMP signaling. This model**  
35 **also allowed us to identify an inhibitory role for SOX17 in the specification of anterior**  
36 **hypoblast-like cells<sup>2</sup>. Modulation of the subpopulations in the hypoblast-like compartment**  
37 **demonstrated that extraembryonic-like cells impact epiblast-like domain differentiation,**  
38 **highlighting functional tissue-tissue crosstalk. In conclusion, we present a modular,**  
39 **tractable, integrated<sup>3</sup> model of the human embryo that will allow us to probe key questions**  
40 **of human post-implantation development, a critical window when significant numbers of**  
41 **pregnancies fail.**

## 42 43 Introduction

44 Human reproduction is remarkably inefficient, with an estimated 60% of pregnancies failing during  
45 the first two weeks following fertilization<sup>4,5</sup>. Since the advent of *in vitro* fertilization, human embryos  
46 have been studied throughout the first week of development<sup>1,6</sup>. However, the second week, which  
47 includes implantation into the uterus and preparation for gastrulation, remains a ‘black box’<sup>5</sup>. The

48 human blastocyst at 5-6 days post-fertilization consists of the outermost trophectoderm, precursor  
49 of the placenta, and inner cell mass, which gives rise to both the embryonic epiblast and the yolk  
50 sac precursor, the hypoblast. Between 7-8 days post-fertilization the blastocyst implants into the  
51 endometrium and the epiblast polarizes and transitions from the naïve state of pluripotency to the  
52 primed state<sup>1</sup>. A central amniotic cavity forms within the epiblast, separating the dorsal amniotic  
53 epithelium and the ventral epiblast, which maintains pluripotency and gives rise to the embryo  
54 proper<sup>1</sup>. The trophectoderm develops into several trophoblast subtypes following implantation<sup>7</sup>  
55 and the hypoblast forms the primary, and then secondary, yolk sac. A subset of cells in the  
56 hypoblast maintains expression of NODAL, BMP and WNT inhibitors, safeguarding the future  
57 anterior epiblast from posteriorizing signals during primitive streak formation, marked by  
58 upregulation of BRY/TBXT<sup>2</sup>. An additional extraembryonic tissue, the extraembryonic  
59 mesenchyme, is located between the inner cell mass-derived tissues and the trophoblast,  
60 however, the origin of these cells remains unclear<sup>8</sup>.

61  
62 Recent work in mouse embryos established conditions amenable to human embryo *in vitro* culture  
63 through implantation, opening this developmental black box for the first time<sup>9-12</sup>. We and other  
64 groups have used this system to characterize major developmental events, including formation of  
65 the anterior hypoblast domain, specification of trophoblast subtypes and transitions in epiblast  
66 pluripotency state<sup>2,7,13-15</sup>. However, mechanistic work in the human embryo remains challenging.  
67 Thus, stem cell-derived models of the human embryo will serve as an important and  
68 complementary tool to understanding this crucial period of our development. Several groups have  
69 reported the generation of blastocyst-like structures derived from human embryonic stem cells  
70 (hESCs)<sup>16-20</sup>. These ‘blastoids’ resemble the pre-implantation embryo but develop poorly to post-  
71 implantation stages. Other models, including gastruloids, 2D micropatterns and embryoid bodies,  
72 are capable of modelling aspects of post-implantation development<sup>21-24</sup>. However, these models  
73 are derived entirely from hESC, lack extraembryonic tissues, and do not recapitulate embryo

74 morphology. A recent study, which combines epiblast-like spheroids with BMP4-treated hESCs  
75 expressing a mixture of extraembryonic markers, marks a step towards integrated models of the  
76 post-implantation embryo<sup>25</sup>. However, this model does not exhibit self-organization of an epiblast-  
77 like compartment in the context of extra-embryonic tissues until after lumenogenesis, and the  
78 BMP4 treated hESCs are not correlated to targeted extraembryonic lineages.

79

80 Several protocols have been developed to derive trophoblast and hypoblast cells from hESCs<sup>26-</sup>  
81 <sup>31</sup>. Importantly, the pluripotent state influences the developmental trajectory of differentiated  
82 cells<sup>26,27</sup>. The derivation of lineage-specific cell lines offers scope for modelling these tissues *in*  
83 *vitro*. However, generating a modular, integrated model system that includes both embryonic and  
84 extraembryonic tissues has proven challenging. This may be due to the opposing signaling  
85 pathway modulators required for in hESC culture, hypoblast-like cell differentiation, and  
86 trophoblast-like cell differentiation. Moreover, while tissue-tissue crosstalk is an advantage of  
87 integrated model systems, generation of embryoids in media containing exogenous factors may  
88 compromise tissue-driven self-organization. Given these limitations, and the ability of tri-lineage  
89 models to mimic mouse development<sup>32-34</sup>, we utilized the approach of overexpressing  
90 transcription factors that can drive generation of extraembryonic-like cells without the need for  
91 exogenous factors.

92

93 We show that aggregates of induced extraembryonic-like lineages and wildtype hESC are  
94 capable of self-organisation into embryo-like structures, which mimic several hallmarks of post-  
95 implantation development, including lumenogenesis, amniogenesis, primordial germ cell  
96 formation, and specification of the anterior hypoblast. Importantly, these inducible human  
97 embryoids are modular, do not rely on exogenous signaling factors, and are amenable to genetic  
98 perturbation.

99

## 100 **Results**

### 101 ***Transcription factor-mediated induction of extraembryonic lineages***

102 Mouse ESCs can be induced to generate extraembryonic endoderm or trophoblast through  
103 expression of *Gata4* or *Cdx2*, respectively, and these cells are capable of modelling development  
104 in a 3D embryoid models<sup>33-35</sup>. Thus, we first identified factors that can similarly upregulate  
105 extraembryonic gene programs in human ESC. Notably, pluripotent state, in part, dictates  
106 differentiation potential from ESCs<sup>26,27,29,30,36</sup>. Therefore, we overexpressed candidate  
107 transcription factors in hESCs across the pluripotency spectrum to assess which factors are able  
108 to program hESCs to trophoblast or hypoblast-like cells. We first integrated published single cell  
109 RNA-sequencing data of human embryos cultured until gastrulation<sup>2,13,37-40</sup> and used the  
110 computational tool SCENIC to score the predicted activity of transcription factors enriched in the  
111 epiblast, trophoblast or hypoblast to generate a putative gene regulatory network (**Extended**  
112 **Figure 1A**)<sup>41</sup>. As expected, we found that *SOX2*, *NANOG* and *POU5F1* (*OCT4*) showed high  
113 predicted activity in the epiblast. Transcription factors including *GATA4*, *GATA6*, *SOX17* and  
114 *FOXA2* were particularly active in the hypoblast and *GATA3*, *NR2F2*, *GATA2* and *TFAP2C* (also  
115 known as *AP2γ*) showed enriched activity in the trophoblast (**Extended Figures 1A-B**). The  
116 overexpression of *GATA6* or *SOX17* has been shown to drive endodermal gene programs from  
117 primed hESCs<sup>42,43</sup>, therefore, we selected them as candidates to program hESCs to become  
118 hypoblast-like. Similarly, *GATA3* and *TFAP2C* have been reported to share high chromatin co-  
119 occupancy during differentiation of hESCs into trophoblast stem cells<sup>44</sup>. This, together with their  
120 high predicted activity in trophoblast, led us to select *GATA3* and *TFAP2C* as candidates to drive  
121 hESCs to become trophoblast-like. We generated hESCs with doxycycline-inducible individual or  
122 combined transgenes for the transcription factors of interest: namely *GATA6* and *SOX17* to  
123 program hESCs to hypoblast-like cells (**Figure 1A**); and *GATA3* (together with an *eGFP* also

**Figure 1**

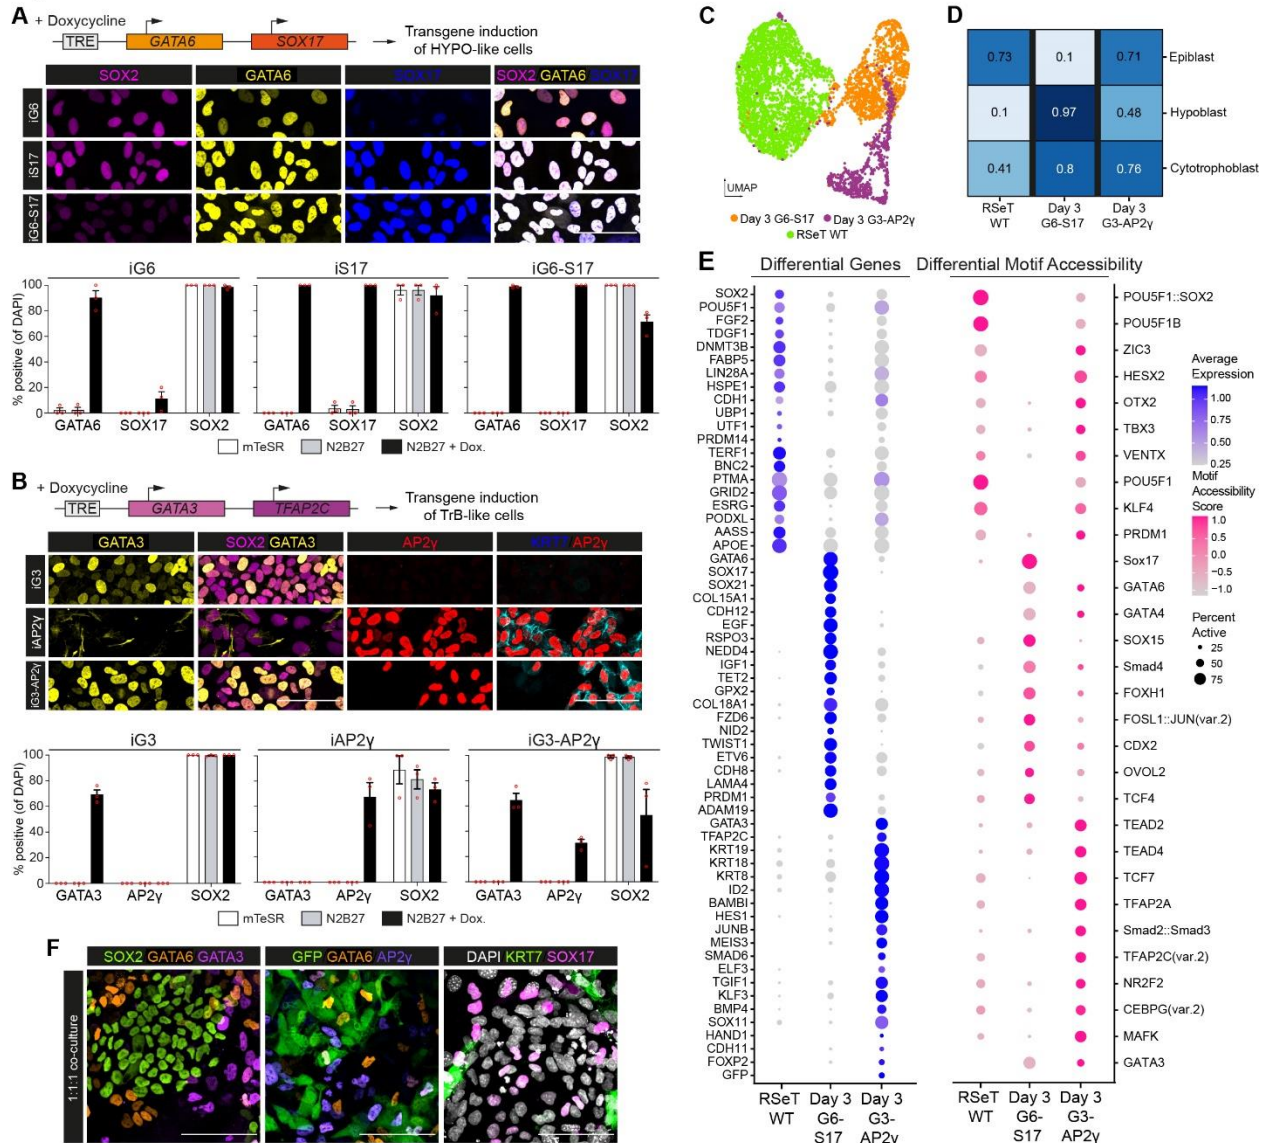

**Figure 1. Validation of extraembryonic-like induction.**

(A) Generation of inducible GATA6 (iG6) and/or SOX17 (iS17) hESCs and validation after 24 hours of doxycycline addition in basal N2B27. N=3 independent experiments with 551 iG6, 550 iS17, 707 G6-S17 cells (B) Generation of inducible GATA3 (iG3) and/or AP2y (iAP2y) hESCs and validation after 24 hours of doxycycline addition in basal N2B27. N=3 independent experiments with 1456 iG3, 409 iAP2y, 782 iG3-AP2y cells (C) Visualization of Uniform Manifold Approximation and Projection (UMAP)-based dimensional reduction of sequenced wildtype (RSeT WT), inducible GATA6-SOX17 (Day 3 iG6-S17) and inducible GATA3-AP2y (Day 3 iG3-AP2y) RSeT hESCs after 3 days of doxycycline induction. (D) Logistic regression analysis and comparison of cells to human post-implantation embryo populations. Cell line data projected onto human embryo data from Molè et al., 2021. (E) Selected differentially expressed genes from RNA-sequencing (blue; left) and predicted differential motif accessibility from ATAC-sequencing scored by chromVAR (pink; right) for wildtype, inducible GATA6-SOX17 and inducible GATA3-AP2y RSeT hESCs after 3 days of doxycycline induction. (F) Validation of wildtype, inducible GATA6-SOX17 and inducible GATA3-AP2y RSeT hESC co-culture in 2D.

124 driven by doxycycline) and *TFAP2C* to program hESCs to trophoblast-like cells (**Figure 1B**).



125 Transcription factor induction was validated following doxycycline administration for 24 hours  
126 **(Figures 1A-B).**

127

128 To assess the capacity of the selected candidate transcription factors to program hESCs to extra-  
129 embryonic-like cell identity, we overexpressed them – singly and in combination – in cells across  
130 the naïve-to-primed pluripotency spectrum. We cultured cells using three established starting  
131 conditions: PXGL, which supports pre-implantation-like naïve hESCs; RSeT, which generates  
132 intermediate peri-implantation-like pluripotent hESCs; and conventional mTeSR1 conditions to  
133 maintain post-implantation-like primed hESCs. After three days of transcription factor  
134 overexpression in basal N2B27 media, we observed significant differences in extraembryonic  
135 gene induction using both individual or combined transgenes and starting from different  
136 pluripotency states, at both the protein and mRNA level (**Extended Figure 1C-D, Extended**  
137 **Figure 2**). In hypoblast-like cell induction, GATA6 overexpression did not drive SOX17 expression  
138 after 3 days of induction in N2B27 from RSeT or PXGL conditions, but SOX17 overexpression  
139 resulted in robust GATA6 upregulation across starting pluripotency state conditions (**Extended**  
140 **Figure 1C, 2A-B**). FOXA2 expression was consistently upregulated after combined GATA6 and  
141 SOX17 induction from primed and RSeT, but not from PXGL conditions (**Extended Figure 2A-**  
142 **B**). These data indicate that while GATA6 and SOX17 can indeed drive endodermal gene  
143 programs, the regulation of specific downstream targets differs depending on the initial  
144 pluripotency state.

145

146 The AP2 $\gamma$  transgene appeared particularly effective in upregulating GATA2 and CK7 expression  
147 when driving trophoblast-like cell formation. However, induction of AP2 $\gamma$  alone resulted in cell  
148 death and loss of transgene expression in primed, but not RSeT or PXGL, cells (**Extended Figure**  
149 **2C-D**). Combined induction of GATA6 and SOX17 or GATA3 and AP2 $\gamma$  resulted in consistent

150 downregulation of pluripotency markers, including NANOG, SOX2 and OCT4 (**Extended Figure**  
151 **1C-D, Extended Figure 2A-D**).

152

153 We hypothesized that RSeT hESCs are the best starting cell type to generate our stem cell-  
154 derived human post-implantation embryo model because they: (1) represent a peri-implantation  
155 stage of development<sup>27</sup>; (2) express low levels of amnion-specific genes during trophoblast-like  
156 cell induction compared to primed cells (**Extended Figure 1D, Extended Figure 2C-D**); and (3)  
157 are known to more readily differentiate to peri- and post-implantation yolk sac-like endoderm cells  
158 as compared to PXGL cells<sup>26,27</sup>. For these reasons, and the synergistic action of dual induction of  
159 candidate transcription factors, we used RSeT hESCs with inducible GATA6 and SOX17  
160 transgenes for hypoblast-like cell induction and used cells with inducible GATA3 and AP2 $\gamma$   
161 transgenes for trophoblast-like cell induction in subsequent experiments. We compared  
162 transcription factor overexpression-based induction of extraembryonic gene programs to  
163 established exogenous factor-based hypoblast-like cell and trophoblast-like cell directed  
164 differentiation protocols. Dual induction of GATA6 and SOX17 from RSeT cells in basal media  
165 induced endodermal gene expression equivalent to directed differentiation protocols in yolk sac-  
166 like cell differentiation conditions (Activin-A, CHIR99021, and LIF) (**Extended Figures 3A-B**).  
167 Dual induction of GATA3 and AP2 $\gamma$  from RSeT cells in basal media induced trophoblast gene  
168 expression, albeit at varying levels when compared to directed trophoblast differentiation  
169 protocols using MEK/ERK inhibition (PD0325901) and ALK5/7 inhibition (A83-01) with or without  
170 Hippo signaling pathway inhibition (lysophosphatidic acid; LPA) (**Extended Figures 3C-D**).

171

172 To further characterize RSeT hESCs induced to express GATA6-SOX17 or GATA3-AP2 $\gamma$ , we  
173 carried out single-cell 10x multiome sequencing and assessed transcriptomic and chromatin  
174 accessibility simultaneously. When this single-cell data was visualized using uniform manifold

175 approximation and projection (UMAP), cells clustered based on cell type (**Figure 1C**), and the  
176 application of a logistic regression framework showed that the wildtype, inducible GATA6-SOX17,  
177 and inducible GATA3-AP2 $\gamma$  RSeT hESCs had the highest similarities to the epiblast, hypoblast,  
178 and cytotrophoblast of the post-implantation embryo, respectively (**Figure 1D**). Analysis of  
179 differentially expressed genes and differentially accessible motifs scored by chromVAR<sup>45</sup> revealed  
180 similar embryonic and extraembryonic dynamics (**Figure 1E, Extended Figure 4, Extended**  
181 **Table 1**). Specifically, we detected enriched expression and motif accessibility scores of  
182 pluripotency and epiblast markers in RSeT hESCs (*SOX2, POU5F1, TDGF1*); of hypoblast  
183 markers in GATA6-SOX17 inducible cells (*RSPO3, IGF1, PRDM1*); and of trophoblast markers  
184 (*KRT19, KRT18, BMP4*), including Hippo, WNT and TGF $\beta$  pathway components in the GATA3-  
185 AP2 $\gamma$  inducible cells. Together, these data demonstrate that transcription factor-mediated  
186 induction of extraembryonic cell fate from RSeT hESCs readily drives hypoblast- or trophoblast-  
187 like gene programs without the need for exogenous factors. This allows us to overcome the  
188 challenge presented for successful coculture of these cell types by their conflicting culture media  
189 requirements. Indeed, 1:1:1 co-culture of wildtype RSeT hESCs with inducible GATA6-SOX17  
190 and inducible GATA3-AP2 $\gamma$  RSeT hESCs demonstrated good survival and mixed identity after  
191 transgene induction for 3 days (**Figure 1F**).

192

### 193 ***Self-assembly of a tri-lineage 3D post-implantation model***

194 As all three RSeT hESC-derived cell types – wildtype, GATA6-SOX17 inducible and GATA3-AP2 $\gamma$   
195 inducible – can be cocultured in N2B27 medium, we induced expression of the selected  
196 transcription factors with doxycycline for 3 days to generate hypoblast- and trophoblast-like cells  
197 and subsequently aggregated cell mixtures in Aggrewell dishes (**Figure 2A**).

198



**Figure 2**

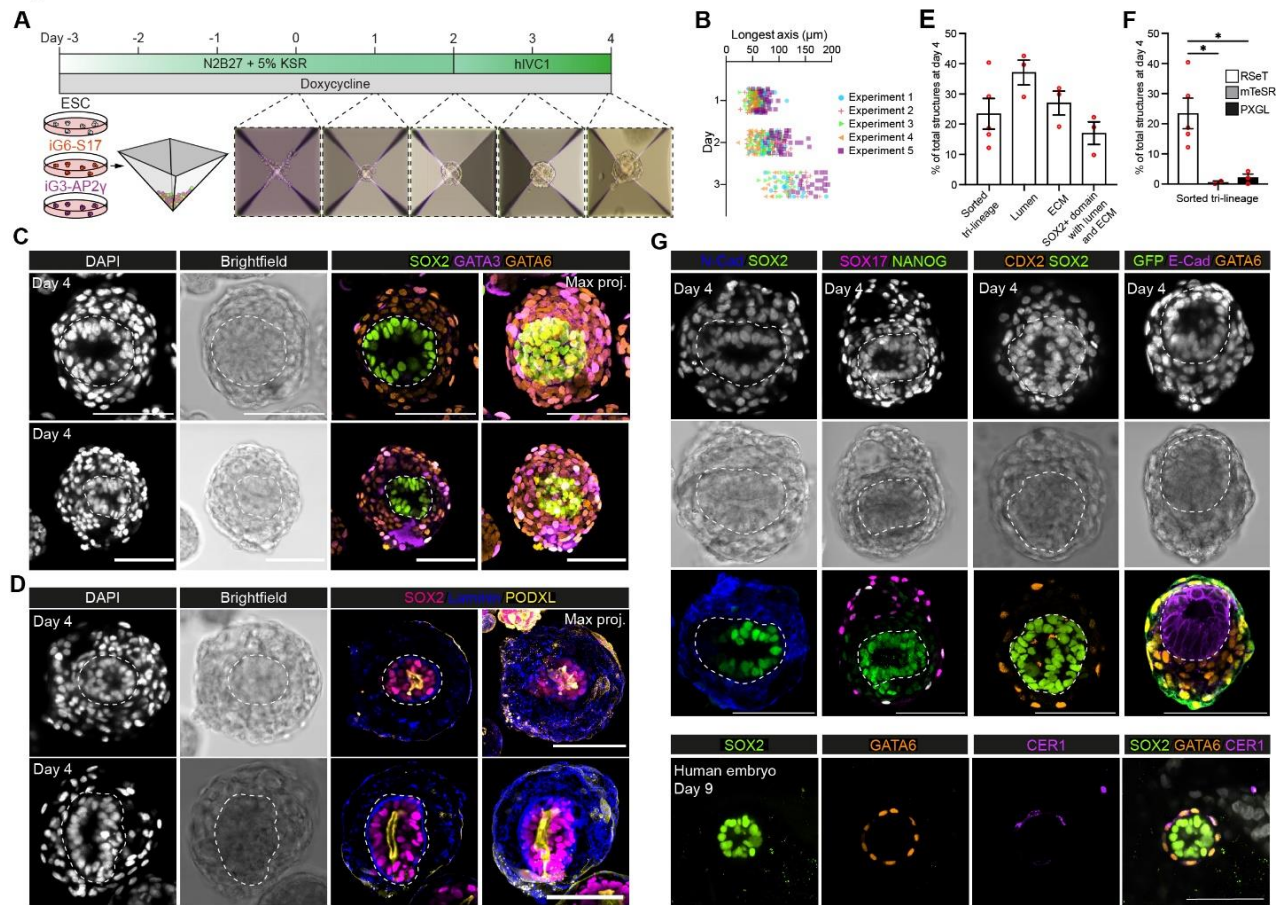

**Figure 2. Generation of inducible post-implantation human embryoids**

(A) Overview of experimental protocol to generate inducible human embryoids by combining wildtype RSeT hESC with inducible extraembryonic-like cells. To generate hypoblast-like cells, inducible GATA6-SOX17 (iG6-S17) was used. To generate trophoblast-like cells, inducible GATA3-AP2y (iG3-AP2y) was used. Extraembryonic-like cells were induced for 3 days before aggregation at Day 0. (B) Size of cell aggregates between day 1 to day 3 following aggregation. N=5 independent experiments with 175 day 1, 171 day 2, and 91 day 3 structures. (C) At 96 hours after aggregation, structures demonstrate clear self-organization with an inner SOX2-positive domain surrounded by sequential layers of GATA6-positive and GATA3-positive extraembryonic-like populations. (D) Inducible human embryoids demonstrate clear apicobasal polarity within the inner SOX2-positive domain, including PODXL-positive lumen formation and basal deposition of laminin between the SOX2-positive epiblast-like and hypoblast-like compartments. (E) Quantification of inducible human embryoid formation efficiency and organization. N=5 independent experiments with 952 structures for tri-lineage, 3 independent experiments with 506 structures for lumen and ECM efficiency. (F) Quantification of inducible human embryoid formation across starting pluripotency states. N=5 independent experiments with 1189 structures quantified. (G) The hypoblast-like domain expresses N-Cadherin and SOX17. Cells derived from inducible GATA3-AP2y (which expresses GFP) show clear outer localization. (H) Representative image of an in vitro cultured human embryo at 9 days post-fertilization showing clear lumenized SOX2 domain surrounded by a layer of GATA6-positive cells. A subset of GATA6-positive cells expresses the anterior hypoblast marker CER1. Scale bars = 100μm. Statistics: (F) one-way ANOVA with Dunnett's multiple comparisons test. \*p<0.05.

199 We plated a ratio of 1:1:2 wildtype:GATA6-SOX17-inducible:GATA3-AP2y-inducible cells with 3.6  
 200 x 10<sup>4</sup> cells per Aggrewell-400 24-well in N2B27 media (approximately 8:8:16 cells per microwell).

201 Cells aggregated within 24 hours, and by 48 hours post-aggregation we observed clear  
202 distinctions between inner and outer cellular domains by brightfield (**Figure 2A**). At 48 hours post-  
203 aggregation, the media was changed to post-implantation human embryo media (hIVC1)<sup>2,12,13</sup>.  
204 Incubation with doxycycline continued throughout the whole period of culture (**Figure 2A**). Cells  
205 aggregated and proliferated consistently across experiments (**Figure 2B**). Four days post-  
206 aggregation, the cell aggregates had self-organized into structures with a SOX2-positive, epiblast-  
207 like domain containing a central lumen; an outer single layer of GATA3-positive putative  
208 trophoblast-like cells; and an intermediate putative hypoblast-like domain of GATA6-positive cells  
209 between inner lumenized domain and outer layer (**Figure 2C**). The inner SOX2-positive domain  
210 exhibited apicobasal polarity with apical expression of the luminal marker PODXL, and basal  
211 deposition of laminin (**Figure 2D**). Similar to experiments in which mouse embryonic and  
212 extraembryonic stem cells were aggregated to generate a post-implantation mouse embryo  
213 model, these structures did not transit through a blastocyst-like morphology prior to forming post-  
214 implantation-like structures<sup>32-34,46-48</sup>. The efficiency of inducible human embryoid formation  
215 (defined as aggregates containing an organized SOX2-positive domain, surrounded by concentric  
216 layers of GATA6-positive and GATA3-positive cells) was approximately 23% (**Figure 2E**). By  
217 contrast, when using primed mTeSR1 or naïve PXGL hESCs as the starting pluripotency state  
218 for constitutive wildtype, GATA6-SOX17 inducible, and GATA3-AP2 $\gamma$  inducible cells, the  
219 efficiency of organized, multi-lineage structure formation was less than 5% (**Figure 2F**).

220

221 Our inducible human embryoids expressed several other lineage markers in an organized  
222 manner, including N-Cadherin and SOX17 in the putative hypoblast-like compartment and CDX2  
223 in the outer layer of putative trophoblast-like cells (**Figure 2G**). We also observed structures with  
224 SOX17 and/or GATA6 expression within outer GATA3-AP2 $\gamma$ -induced cells (marked by eGFP),  
225 which may reflect the reported tendency of peripheral cells to adopt endodermal identities in

226 embryoid bodies<sup>49,50</sup>. The epiblast-like inner compartment expressed SOX2, NANOG and E-  
227 Cadherin and maintained pluripotent and epithelial identity akin to the human embryo (**Figure**  
228 **2G**). These data demonstrate that RSeT hESC-derived epiblast-, hypoblast- and trophoblast-like  
229 cells are able to self-organize into embryo-like structures reminiscent of the post-implantation  
230 human embryo at 8-9 days post-fertilization (**Figure 2H**).

231

### 232 ***Generation of amnion, primordial germ cells, and extra-embryonic mesenchyme***

233 To gain insight into whether our human embryo model develops gene expression and chromatin  
234 accessibility patterns that align to the natural human embryo, we performed single-cell multiome  
235 RNA and ATAC sequencing on human embryo models at 4, 6, and 8 days post-aggregation  
236 (**Figure 3A**). We selected individual structures for sequencing based on their development of the  
237 three tissues: (1) an inner, epithelial domain; (2) an intermediate domain surrounding the central  
238 epithelium; and (3) an outer GFP-positive cell layer (**Extended Figure 5A**). We used these criteria  
239 because these structures represented self-organized stem cell-derived aggregates that  
240 resembled aspects of the post-implantation human embryo. After quality control to filter out cell  
241 barcodes with low mapped reads to either RNA or chromatin, 5217 cells were included in the  
242 analysis spanning all three timepoints (**Figure 3B**). To assign clusters without bias, we used  
243 scmap<sup>51</sup> to project our dataset onto human<sup>2,52</sup> and cynomolgus macaque<sup>53-55</sup> datasets spanning  
244 peri-implantation to gastrula stages (**Figure 3B and Extended Figure 5B**). This analysis allowed  
245 us to project gene expression signatures from previously annotated cynomolgus macaque cell  
246 type clusters including epiblast-, amnion-, visceral endoderm-, extraembryonic mesenchyme- and  
247 gastrulation-like populations onto our human embryo model. The recently published multiome-  
248 based velocity inference program multivelo<sup>56</sup> was used to predict lineage relationships from  
249 combined RNA and chromatin velocity measurements. We found that the inferred differentiation  
250 time correlated well with the transition of structures from day 4 to day 8 post-aggregation. These  
251 data, in combination with canonical marker expression, allowed us to annotate the cell types in

252 our human embryo model (**Figure 3B and Extended Figure 5C**). We identified clusters  
253 resembling embryonic late-epiblast (L-EPI: *TDGF1*, *SOX2*, *NANOG*-positive), amnion (AM-1:  
254 *TFAP2A*, *ID1*-positive; AM-2: *ISL1*, *TFAP2C*-positive; and AM-3: *GABRP*, *VTCN1*, *GRHL1*,  
255 *MEIS1*-positive), mesoderm (MESO-1: *TBXT*+, *MESP1*-positive; MESO-2: *MIXL1*, *CER1*, *SNAI1*,  
256 *EOMES*-positive), extraembryonic mesenchyme (EXMC: *POSTN*, *COL6A3*, *IGF2*, *TBX20*-  
257 positive) and hypoblast/visceral endoderm (HYPO/VE: *BMP6*, *CDH2*, *HNF1B*, *FOXA2*-positive)  
258 (**Figure 3C and Extended Figure 5C-D**). We did not identify a distinct trophoblast-like cluster  
259 derived from the GFP-positive inducible GATA3-AP2 $\gamma$  cells, despite their presence as an outer  
260 layer within the inducible human embryoids (**Figure 3A, Extended Figure 5E**). Given the aberrant  
261 upregulation of endodermal markers after aggregation, inducible GATA3-AP2 $\gamma$ -derived cells were  
262 not likely to represent *bona fide* trophoblast. Nevertheless, these inducible human embryoids  
263 generated several cell types which do not appear to be formed when human embryos are cultured  
264 *in vitro* through implantation, including amnion and extraembryonic mesenchyme. This is in  
265 agreement with immunofluorescence analysis that demonstrated that the inner, SOX2-positive  
266 domain exited pluripotency by day 6 post-aggregation and upregulated amnion markers, including  
267 CDX2 and ISL1. In addition, by day 8 post-aggregation, the inner domain upregulated mature  
268 amnion markers VTCN1 and HAND1 (**Figure 3D, Extended Figure 6A-B**). The GATA6-positive  
269 domain also co-expressed HAND1, supporting the presence of extraembryonic mesenchyme  
270 (**Extended Figure 6A-B**). A subset of GATA6-positive cells showed high co-expression of FOXF1  
271 or TBX20, highlighting the two populations within the intermediate domain of our human embryo  
272 model: hypoblast cells (GATA6-positive, FOXF1 or TBX20-low) and extraembryonic  
273 mesenchyme (GATA6-positive, FOXF1 or TBX20-high) (**Extended Figure 6C-F**).

274



**Figure 3**

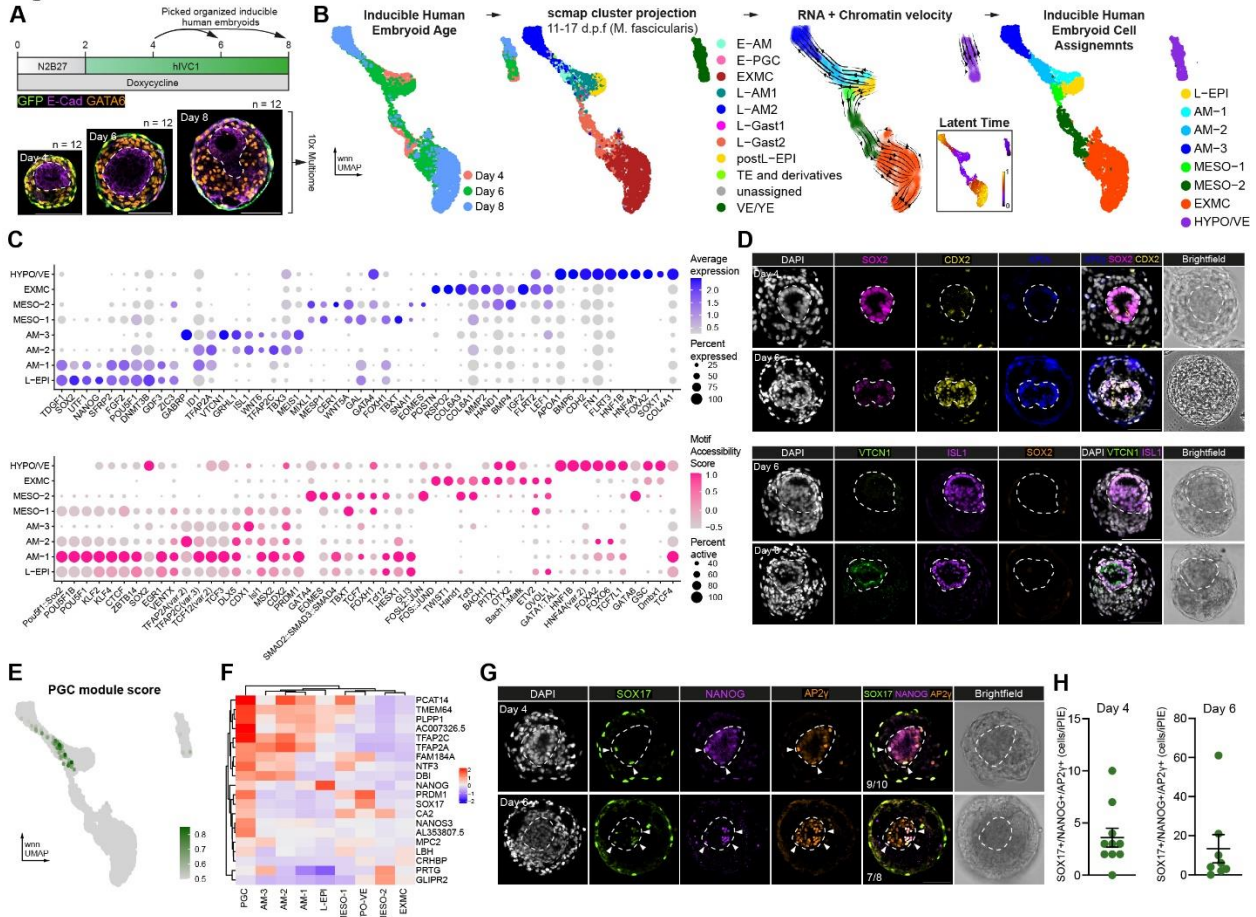

275

**Figure 3. Differentiation of extraembryonic mesenchyme, amnion, and primordial germ cells.**

(A) Schematic of extended culture protocol of inducible human embryoids and sampling for combined single-cell RNA and single-cell ATAC sequencing using the 10x platform. (B) Cells were annotated based on transcriptional projection to multiple human and non-human primate embryo datasets using scmap in conjunction with RNA and chromatin velocity. (C) Selected differentially expressed genes in the RNA-sequencing data (top, blue) and predicted differentially accessible motifs scored by chromVAR on the ATAC-sequencing data (bottom, pink) across clusters. (D) Inducible human embryoids downregulated SOX2 and upregulated CDX2, ISL1 at day 6 and VTCN1 at day 8, indicative of robust amnion differentiation and maturation. (E) Module scoring for primordial germ cell marker genes (Jo et al., 2021). (F) Heatmap of selected primordial germ cell genes across clusters. (G) Immunofluorescence identification of SOX17/NANOG/AP2 $\gamma$  triple-positive primordial germ cell-like cells in inducible human embryoids highlighted by arrowheads. (H) Quantification of SOX17/NANOG/AP2 $\gamma$  triple-positive (+) cells at days 4 (n=10 embryoids) and 6 (n=10 embryoids). N=2 independent experiments. Scale bars = 100 $\mu$ m.

276

277 Recent reports have postulated that both amnion and primordial germ cells, the precursors to  
 278 gametes, are at least partially generated from a bipotent progenitor *in vitro*<sup>57-59</sup>. We therefore  
 279 asked whether such progenitors or their progeny were specified in our human embryo model. We  
 280 first assigned a primordial germ cell module score based on expression of genes identified in  
 281 human primordial germ cell-like cells differentiated *in vitro*<sup>60</sup>. We could identify cells with

282 transcriptomes resembling primordial germ cell-like cells mostly throughout the amnion clusters  
283 AM-1, AM-2, and a small number within the mesodermal cluster MESO-1 **Figure 3E**). Putative  
284 primordial germ cell-like cells in inducible human embryoids expressed *TFAP2A* (also known as  
285 AP2 $\alpha$ ), a crucial marker of bipotent amnion and primordial germ cell-like cell progenitors<sup>57-59</sup>. In  
286 contrast to other cells in AM-1 and AM-2 clusters, primordial germ cell-like cells expressed the  
287 pluripotency marker *NANOG* and primordial germ cell markers *PRDM1* (also known as BLIMP1)  
288 and *NANOS3* (**Figure 3F**). Immunofluorescence analysis of a canonical set of human primordial  
289 germ cell markers<sup>57</sup> confirmed that SOX17/NANOG/AP2 $\gamma$  triple-positive primordial germ cell-like  
290 cells were observed by day 4 post-aggregation and increased in number by day 6 post-  
291 aggregation (**Figures 3G-H**). These data demonstrate that our human embryo model specifies  
292 *bona fide* germ cells. This primordial germ cell-like cell specification is concomitant with amnion-  
293 like cell formation and occurs within the inner epiblast-like compartment, supporting the existence  
294 of a bipotent progenitor for these two lineages.

295

### 296 ***The epiblast-like domain differentiates to amnion and extraembryonic mesenchyme in*** 297 ***response to BMP signaling***

298 Both amnion and extraembryonic mesenchyme are thought to arise in response to BMP signaling  
299 in the primate embryo<sup>8,53,61,62</sup>. To understand if this is consistent in our human embryo model, we  
300 examined the expression of downstream BMP response genes *ID1-4*<sup>63</sup>. *ID1* and *ID4* were  
301 upregulated during amnion formation, while *ID3* and *ID2* were enriched in both amnion and  
302 extraembryonic mesenchyme trajectories, indicating that BMP signaling was likely active (**Figure**  
303 **4A**)<sup>63</sup>. In support of this, SMAD5 motif accessibility based on the ATAC-sequencing (scored by  
304 chromVAR<sup>45</sup>) was high in both trajectories while SMAD2::SMAD3::SMAD4 motif accessibility  
305 score, a downstream target of Activin-NODAL signaling, was not (**Figure 4B**). In line with this  
306 observation, a high BMP and low NODAL signaling environment has been implicated recently in  
307 amnion differentiation of marmoset ESCs<sup>64</sup> and in hESC to extraembryonic mesenchyme



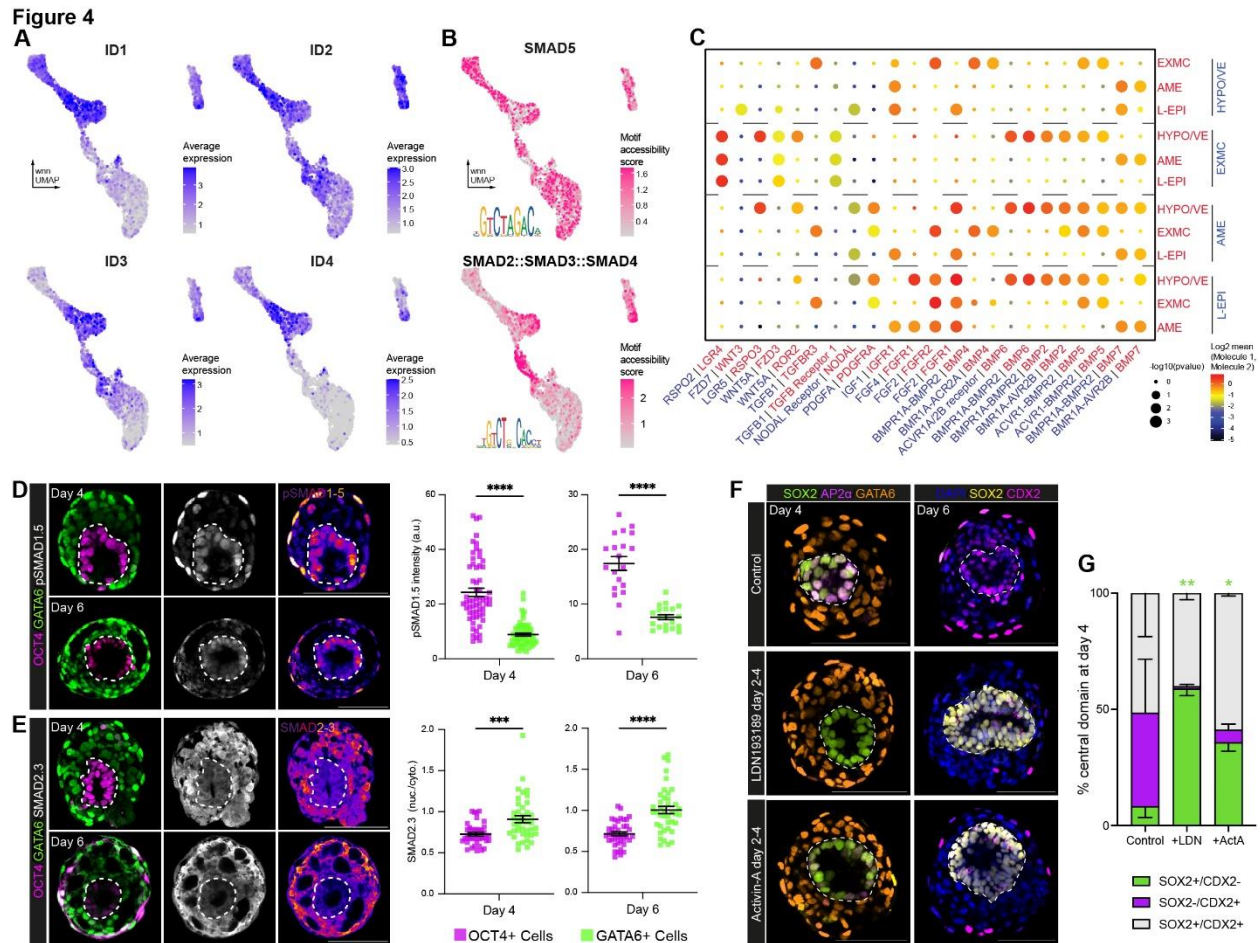

308 differentiation<sup>62</sup>, suggesting that similar dynamics may drive differentiation of these populations  
 309 within inducible human embryoids.

310

311 To further understand potential tissue-tissue crosstalk in our human embryo model, we used the

312 computational tool CellPhoneDB<sup>65</sup> to predict ligand-receptor pairing across clusters in our single

313 cell sequencing data (**Figure 4C, Extended Figure 7A-B**). This analysis uses the expression of  
314 curated receptor-ligand pairs across clusters to score potential tissue-tissue crosstalk.  
315 CellPhoneDB predicted that hypoblast cluster-derived BMP2/6 and extraembryonic  
316 mesenchyme-secreted BMP4 were likely mediators of tissue-tissue crosstalk, and thus potentially  
317 drivers of cell differentiation. In contrast, predicted NODAL signaling between tissues was low,  
318 further supporting the presence of a high BMP, low NODAL signaling environment in the human  
319 embryo model. When CellPhoneDB was applied to the single cell sequencing data of the three  
320 cell lines aggregated to generate the embryo model (wildtype, inducible GATA6-SOX17 and  
321 inducible GATA3-AP2 $\gamma$  RSeT hESCs), the inducible GATA3-AP2 $\gamma$  cells were predicted to be the  
322 initial source of BMP (**Extended Figure 7C**). Despite the lack of distinct trophoblast-like cells in  
323 the inducible human embryoids at later stages, aggregation of inducible GATA6-SOX17 and  
324 wildtype RSeT hESC alone (i.e. without inducible GATA3-AP2 $\gamma$  cells) resulted in failure to form  
325 organized structures (**Extended Figure 7D**).

326

327 To verify whether BMP signaling has an active role in the differentiation of the inner domain of the  
328 embryo model, we examined phosphorylated (p)SMAD1.5 expression. pSMAD1.5 enrichment in  
329 the OCT4-positive epiblast-like domain at days 4 and 6 post-aggregation was indicative of active  
330 BMP signaling (**Figure 4D**). This was in contrast to the low nuclear/cytoplasmic ratio of total  
331 SMAD2.3, reflecting low NODAL signaling, in the epiblast-like domain (**Figure 4E**). These findings  
332 accord with the CellPhoneDB predictions. To functionally validate the role of BMP signaling in the  
333 differentiation of the inner domain, we treated the human embryo model with the ALK1/2/3/6 (BMP  
334 receptors) inhibitor LDN193189 between 48- and 96-hours post-aggregation. LDN193189 treated  
335 structures exhibited increased maintenance of SOX2 expression in the inner domain and lesser  
336 CDX2 and AP2 $\alpha$  upregulation at day 4 and day 6 post-aggregation, compared to untreated control  
337 structures. Supplementation with Activin-A, an agonist of SMAD2.3 signaling, resulted in a similar

338 phenotype, though to a lesser degree (**Figure 4F-G, Extended Figure 7E**). These data  
339 demonstrate that the high levels of BMP activity and low levels of NODAL are key drivers of  
340 epiblast to amnion differentiation within the inner epithelial compartment of inducible human  
341 embryoids.

342

### 343 ***Prolonged SOX17 overexpression inhibits formation of the anterior hypoblast***

344 BMP signals are localized to the posterior of the embryo by the antagonistic action of the anterior  
345 hypoblast, which secretes inhibitors of BMP, WNT and NODAL, including CER1 and LEFTY1<sup>2</sup>.  
346 We have recently demonstrated that these markers of the anterior hypoblast are expressed in  
347 peri- and post-implantation human embryos cultured *in vitro*<sup>2</sup>. Examination of hypoblast-like cells  
348 in our inducible human embryoids revealed that neither *CER1* nor *LEFTY1* were meaningfully  
349 expressed in the HYPO/VE single cell sequencing cluster (**Figure 5A**). We therefore reanalyzed  
350 our previously published 10x single-cell RNA sequencing data from post-implantation human  
351 embryos and the previously scored transcription factor activity. This analysis revealed that SOX17  
352 regulon activity was enriched in the *CER1*-negative hypoblast subcluster in post-implantation  
353 human embryos (**Figure 5B**)<sup>2</sup>. Indeed, induction of SOX17 singly or in combination with GATA6  
354 resulted in decreased capacity to upregulate *CER1*, as compared with GATA6 overexpression  
355 alone (**Extended Figure 1C**). To test whether single induction of GATA6 changed the constitution  
356 of hypoblast-like cell subpopulations in our human embryo model, we generated hypoblast-like  
357 cells by either inducing GATA6 expression alone or in combination with SOX17. Embryoids  
358 generated with inducible GATA6 cells at day 4 post-aggregation exhibited an increased proportion  
359 of CER1-positive cells compared to embryoids generated with inducible GATA6-SOX17 cells  
360 (**Figure 5C**). By day 6 post-aggregation, CER1 expression had decreased in structures generated  
361 with GATA6-induced cells (**Extended Figure 8A**). However, the transient presence of CER1-  
362 positive anterior hypoblast-like cells functionally impacted the epiblast-like domain. Structures  
363 generated using hypoblast-like cells with single GATA6 induction showed a higher proportion of

Figure 5

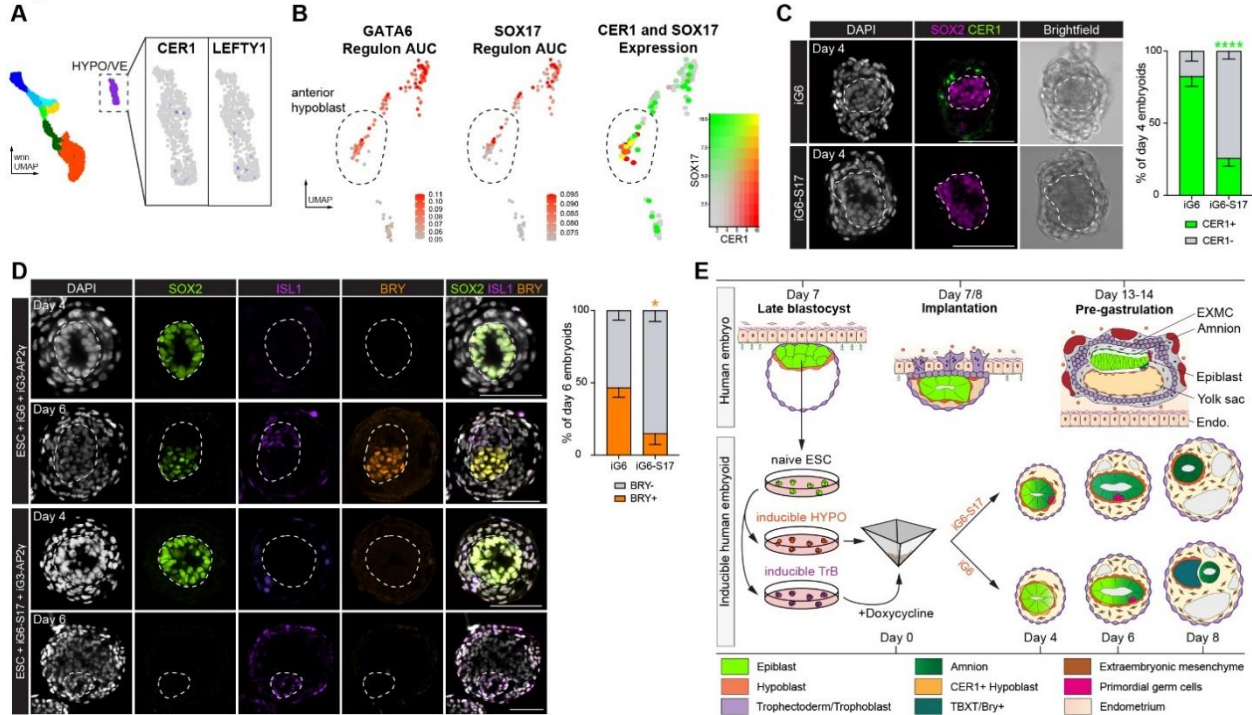

**Figure 5. SOX17 induction is antagonistic to specification of the anterior hypoblast.**

(A) Expression of *CER1* and *LEFTY1* in the HYPO/VE cluster of sequenced inducible human embryoids. (B) Analysis of GATA6 and SOX17 regulon activity scored by SCENIC and SOX17 and *CER1* co-expression in the hypoblast of post-implantation human embryos (9-11 days post-fertilization). Data from Molé et al. (C) Representative examples of inducible human embryoids and quantification showing *CER1*-positive cells surrounding the epiblast-like domain generated using induced GATA6 (iG6) but not induced GATA6-SOX17 (iG6-S17) dual induction of hypoblast-like cells. n=66 structures from 3 independent experiments. (D) Representative immunofluorescence staining and quantification of ISL1 and BRY/TBXT expression in inducible human embryoids generated from inducible GATA6 or inducible GATA6-SOX17 dual induction. n=29 structures from 3 independent experiments. (E) Schematic overview of inducible human embryoid formation and development compared to the human embryo. The inducible embryoids are generated by combining naïve ESCs with transgene-induced extraembryonic lineages. Embryoids self-organize and mimic aspects of human post-implantation development, including lumenogenesis, pluripotency exit, amnion and extraembryonic mesenchyme differentiation, and primordial germ cell formation. Generating embryoids with single induction of GATA6 (iG6) rather than together with SOX17 (iG6-S17) results in higher rates of anterior hypoblast differentiation, allowing for later pluripotency exit and primitive streak-like differentiation. Statistics (C-D): RM two-way ANOVA with Sidak's multiple comparisons test. \*p<0.05, \*\*p<0.01, \*\*\*p<0.001, \*\*\*\*p<0.0001.

364 inner domains containing cells expressing primitive streak marker BRY/TBXT at day 6 post-  
 365 aggregation as compared to structures with GATA6-SOX17 induction (**Figure 5D**). This is likely  
 366 to be in response to the transient anterior hypoblast population protecting pluripotency for a longer  
 367 period in these structures compared to structures generated with inducible GATA6-SOX17 cells  
 368 lacking the *CER1* anterior hypoblast-like domain.

369

370



371 Together, these data highlight functional differences in the gene regulatory network underlying  
372 differentiation of hypoblast subpopulations of cells, where prolonged, high SOX17 expression is  
373 antagonistic to anterior hypoblast identity and instead promotes CER1-negative hypoblast  
374 identity. Thus, by modulating the hypoblast-like cells in inducible human embryoids, we reveal the  
375 capacity of the epiblast-like domain to upregulate primitive streak markers, demonstrating the  
376 value of this modular embryo model to study interactions between embryonic and extraembryonic  
377 tissues.

378

## 379 **Discussion**

380 Here, we have generated a multi-lineage stem cell-derived model of the human post-implantation  
381 embryo that undergoes lumenogenesis in its epiblast-like domain and differentiation events that  
382 reflect interactions between extraembryonic-like and embryonic-like tissues. Our human embryo  
383 model forms amnion-like cells in response to BMP signaling, which progressively mature along a  
384 trajectory conserved between primates, transitioning from AP2 $\alpha$ -positive to ISL1- and CDX2-  
385 positive to VTCN1-positive amnion cells<sup>54,64,66</sup>. These induced human embryoids specify  
386 primordial germ cell-like cells, which occurs as cells progress along the amnion differentiation  
387 trajectory, likely originating from a common AP2 $\alpha$ -positive progenitor as reported in other *in vitro*  
388 systems<sup>57-59</sup>. Similarly, extraembryonic mesenchyme-like cells are specified within our embryo  
389 model, which closely resemble those of the primate embryo. The origin of extraembryonic  
390 mesenchyme in the human and non-human primate embryos remains unclear<sup>8</sup>. Our single cell  
391 sequencing analysis suggests a trajectory from the late epiblast-like population through a  
392 mesodermal intermediate, in line with a recently reported *in vitro* extraembryonic mesenchyme  
393 differentiation protocol<sup>54,62</sup>, data from cynomolgus macaque<sup>54</sup>, and historical observations in  
394 rhesus macaque and human embryos<sup>67</sup>.

395

396 We show that modulating the transcription factor combination used to drive hypoblast-like cell  
397 induction shifts the balance of hypoblast contribution from CER1-negative hypoblast-like cells  
398 (GATA6-SOX17 induction) towards CER1-positive anterior hypoblast-like cells (GATA6 induction  
399 alone). The presence of the anterior hypoblast-like cells at day 4 post-aggregation appears to  
400 protect epiblast-like domain pluripotency for a longer period, allowing for exit from pluripotency at  
401 a developmentally later stage. This result is in agreement with the increased expression of the  
402 primitive streak marker BRY/TBXT at day 6 post-aggregation. These results suggest that RSeT  
403 hESCs acquire the capacity to differentiate into primitive streak-like cells in the embryo model  
404 over time as reported for other naïve hESC<sup>68</sup>. In contrast, the prolonged induction of SOX17  
405 (together with GATA6) in hypoblast-like cells inhibits CER1 expression, leading to the earlier  
406 upregulation of pSMAD1.5 and precocious differentiation toward amnion and extraembryonic  
407 mesenchyme fates. This points to the existence of a distinct intermediate pluripotent state able to  
408 give rise to both amnion and extraembryonic mesenchyme, but not to germ layer derivatives.  
409 Thus, the human embryo model we have established here might be particularly useful to study  
410 the formation of amnion and extraembryonic mesenchyme as both lineages are not established  
411 during extended *in vitro* culture of human embryos<sup>2,9,11,13,40,69</sup>.

412

413 Here, we have driven the expression of specific transcription factors to generate the two  
414 extraembryonic cell types from pluripotent hESCs and, by combining these with the parental  
415 hESC cell line, have generated a post-implantation human embryo model. Transcription factor-  
416 mediated induction of extraembryonic cells has also been used in the generation of post-  
417 implantation stem cell-derived mouse embryo models<sup>33,34,46</sup>. These methods allow for simple,  
418 robust culture of extraembryonic-like cells, which can be widely adopted. In contrast to pre-  
419 implantation blastoid models, the modular generation of embryoids from their constitutive parts  
420 (e.g. epiblast-, hypoblast- and trophoblast-like populations) will be useful in interrogating the role  
421 of specific tissues and tissue-specific gene requirements. We predict that the human embryoids



422 we established here will become a complementary tool to address tissue-tissue crosstalk.  
423 However, the use of transcription factor overexpression to generate extraembryonic tissues may  
424 also lead to deficiencies in differentiation, as observed in models of mouse embryogenesis<sup>33</sup>. For  
425 example, while GATA3 and AP2 $\gamma$  induction drive trophoblast-like gene programs in 2D, this  
426 population is diminished in our human embryo model after aggregation and aberrantly co-  
427 expressed endodermal markers (including SOX17 and GATA6), potentially due to their peripheral  
428 position within the structure<sup>49,50</sup>. Nevertheless, the GATA3-AP2 $\gamma$  inducible cells are required for  
429 cell aggregation, survival and organization to form the embryoids. Strikingly, induction of  
430 downstream gene regulatory networks driving both trophoblast and hypoblast lineages differed  
431 based on the initial pluripotent state. We show that this stem cell-derived model is more easily  
432 produced using peri-implantation stage, intermediate pluripotent state RSeT hESCs rather than  
433 pre-implantation stage, naïve PXGL hESCs or post-implantation stage, primed hESCs.  
434 Generating embryo-like structures from discordant pluripotent states (e.g. induction of GATA3  
435 and/or AP2 $\gamma$  in naïve PXGL hESCs combined with the other two cell types from a starting RSeT  
436 condition) may lead to better recapitulation of extraembryonic fates in the future. Of note,  
437 however, PXGL hESC require extensive capacitation *in vitro* to give rise to germ layers<sup>68</sup> and  
438 blastoid models generated from naïve hESCs currently fail to model post-implantation stages  
439 robustly<sup>18-20</sup>. Similarly, primed ESCs are described by several groups to give rise to amnion-like  
440 cells in trophoblast differentiation conditions, in contrast to naïve ESCs<sup>29,30,69</sup>. Thus, further work  
441 interrogating the epigenetic landscape and binding sites of these factors may be useful to improve  
442 strategies to generate *bona fide* extraembryonic cells.

443

444 In summary, we present a modular, tractable model of human post-implantation development that  
445 crucially includes both embryonic- and extraembryonic-like cells. This is a post-implantation  
446 model and therefore does not have the capacity to develop to form viable human embryos, as it  
447 cannot be implanted. These inducible human embryoids do not mimic stages beyond primitive

448 streak formation, nor do they contain all cell types of the gastrulation-stage embryo<sup>3</sup>. However,  
449 the construction of these embryoids demonstrates a significant step towards generating  
450 integrated models of the post-implantation human embryo to allow future mechanistic studies of  
451 post-implantation development that are impossible in the real human embryo.

## 452 Main References

- 453 1 Rossant, J. & Tam, P. P. L. in *Developmental Cell* Vol. 57 152-165 (Cell Press, 2022).
- 454 2 Molè, M. A. *et al.* A single cell characterisation of human embryogenesis identifies pluripotency  
455 transitions and putative anterior hypoblast centre. *Nature Communications* **12** (2021).  
456 <https://doi.org/10.1038/s41467-021-23758-w>
- 457 3 Clark, A. T. *et al.* in *Stem Cell Reports* Vol. 16 1416-1424 (Cell Press, 2021).
- 458 4 Koot, Y. E. M., Teklenburg, G., Salker, M. S., Brosens, J. J. & Macklon, N. S. in *Biochimica et*  
459 *Biophysica Acta - Molecular Basis of Disease* Vol. 1822 1943-1950 (2012).
- 460 5 Macklon, N. S. Conception to ongoing pregnancy: the 'black box' of early pregnancy loss. *Human*  
461 *Reproduction Update* **8**, 333-343 (2002). <https://doi.org/10.1093/humupd/8.4.333>
- 462 6 Molè, M. A., Weberling, A. & Zernicka-Goetz, M. in *Current Topics in Developmental Biology* Vol.  
463 136 113-138 (Academic Press Inc., 2020).
- 464 7 West, R. C. *et al.* Dynamics of trophoblast differentiation in peri-implantation-stage human  
465 embryos. *Proceedings of the National Academy of Sciences of the United States of America* **116**,  
466 22635-22644 (2019). <https://doi.org/10.1073/pnas.1911362116>
- 467 8 Ross, C. & Boroviak, T. E. Origin and function of the yolk sac in primate embryogenesis. *Nature*  
468 *Communications* **11** (2020). <https://doi.org/10.1038/s41467-020-17575-w>
- 469 9 Deglincerti, A. *et al.* Self-organization of the in vitro attached human embryo. *Nature* **533**, 251-254  
470 (2016). <https://doi.org/10.1038/nature17948>
- 471 10 Morris, S. A. *et al.* Dynamics of anterior-posterior axis formation in the developing mouse embryo.  
472 *Nature Communications* **3**, 673-673 (2012). <https://doi.org/10.1038/ncomms1671>
- 473 11 Shahbazi, M. N. *et al.* Self-organization of the human embryo in the absence of maternal tissues.  
474 *Nature Cell Biology* **18**, 700-708 (2016). <https://doi.org/10.1038/ncb3347>
- 475 12 Bedzhov, I., Leung, C. Y., Bialecka, M. & Zernicka-Goetz, M. In vitro culture of mouse blastocysts  
476 beyond the implantation stages. *Nature Protocols* **9**, 2732-2739 (2014).  
477 <https://doi.org/10.1038/nprot.2014.186>
- 478 13 Xiang, L. *et al.* A developmental landscape of 3D-cultured human pre-gastrulation embryos. *Nature*  
479 **577**, 537-542 (2020). <https://doi.org/10.1038/s41586-019-1875-y>
- 480 14 Ruane, P. T. *et al.* Trophectoderm differentiation to invasive syncytiotrophoblast is promoted by  
481 endometrial epithelial cells during human embryo implantation. *Human Reproduction* **37**, 777-792  
482 (2022). <https://doi.org/10.1093/humrep/deac008>
- 483 15 Shahbazi, M. N. *et al.* Pluripotent state transitions coordinate morphogenesis in mouse and human  
484 embryos. *Nature* **552**, 239-243 (2017). <https://doi.org/10.1038/nature24675>
- 485 16 Liu, X. *et al.* Modelling human blastocysts by reprogramming fibroblasts into iBlastoids. *Nature* **591**,  
486 627-632 (2021). <https://doi.org/10.1038/s41586-021-03372-y>
- 487 17 Sozen, B. *et al.* Reconstructing aspects of human embryogenesis with pluripotent stem cells.  
488 *Nature Communications* **12** (2021). <https://doi.org/10.1038/s41467-021-25853-4>
- 489 18 Kagawa, H. *et al.* Human blastoids model blastocyst development and implantation. *Nature* **601**,  
490 600-605 (2022). <https://doi.org/10.1038/s41586-021-04267-8>
- 491 19 Yanagida, A. *et al.* Naive stem cell blastocyst model captures human embryo lineage segregation.  
492 *Cell Stem Cell* **28**, 1016-1022.e1014 (2021). <https://doi.org/10.1016/j.stem.2021.04.031>
- 493 20 Yu, L. *et al.* Blastocyst-like structures generated from human pluripotent stem cells. *Nature* **591**,  
494 620-626 (2021). <https://doi.org/10.1038/s41586-021-03356-y>
- 495 21 Zheng, Y. *et al.* Controlled modelling of human epiblast and amnion development using stem cells.  
496 *Nature* **573**, 421-425 (2019). <https://doi.org/10.1038/s41586-019-1535-2>
- 497 22 Moris, N. *et al.* An in vitro model of early anteroposterior organization during human development.  
498 *Nature* **582**, 410-415 (2020). <https://doi.org/10.1038/s41586-020-2383-9>
- 499 23 Warmflash, A., Sorre, B., Etoc, F., Siggia, E. D. & Brivanlou, A. H. A method to recapitulate early  
500 embryonic spatial patterning in human embryonic stem cells. *Nature Methods* **11**, 847-854 (2014).  
501 <https://doi.org/10.1038/nMeth.3016>
- 502 24 Simunovic, M. *et al.* A 3D model of a human epiblast reveals BMP4-driven symmetry breaking.  
503 *Nature Cell Biology* **21**, 900-910 (2019). <https://doi.org/10.1038/s41556-019-0349-7>
- 504 25 Simunovic, M., Siggia, E. D. & Brivanlou, A. H. In vitro attachment and symmetry breaking of a  
505 human embryo model assembled from primed embryonic stem cells. *Cell Stem Cell* **29**, 962-  
506 972.e964 (2022). <https://doi.org/10.1016/j.stem.2022.05.001>

- 507 26 Linneberg-Agerholm, M. *et al.* Naïve human pluripotent stem cells respond to Wnt, Nodal and LIF  
508 signalling to produce expandable naïve extra-embryonic endoderm. *Development (Cambridge)* **146**  
509 (2019). <https://doi.org/10.1242/dev.180620>
- 510 27 Mackinlay, K. M. L. *et al.* An in vitro stem cell model of human epiblast and yolk sac interaction.  
511 *eLife* **10** (2021). <https://doi.org/10.7554/eLife.63930>
- 512 28 Io, S. *et al.* Capturing human trophoblast development with naive pluripotent stem cells in vitro. *Cell*  
513 *Stem Cell* **28**, 1023-1039.e1013 (2021). <https://doi.org/10.1016/j.stem.2021.03.013>
- 514 29 Guo, G. *et al.* Human naive epiblast cells possess unrestricted lineage potential. *Cell Stem Cell* **28**,  
515 1040-1056.e1046 (2021). <https://doi.org/10.1016/j.stem.2021.02.025>
- 516 30 Dong, C. *et al.* Derivation of trophoblast stem cells from naïve human pluripotent stem cells. *eLife*  
517 **9** (2020). <https://doi.org/10.7554/eLife.52504>
- 518 31 Weatherbee, B. A. T., Cui, T. & Zernicka-Goetz, M. Modeling human embryo development with  
519 embryonic and extra-embryonic stem cells. *Developmental Biology* **474**, 91-99 (2021).  
520 <https://doi.org/10.1016/j.ydbio.2020.12.010>
- 521 32 Amadei, G. *et al.* Embryo model completes gastrulation to neurulation and organogenesis. *Nature*  
522 **610**, 143-153 (2022). <https://doi.org/10.1038/s41586-022-05246-3>
- 523 33 Lau, K. Y. C. *et al.* Mouse embryo model derived exclusively from embryonic stem cells undergoes  
524 neurulation and heart development. *Cell Stem Cell* **29**, 1445-1458 e1448 (2022).  
525 <https://doi.org/10.1016/j.stem.2022.08.013>
- 526 34 Tarazi, S. *et al.* Post-Gastrulation Synthetic Embryos Generated Ex Utero from Mouse Naïve  
527 ESCs. *Cell* (2022). <https://doi.org/10.1016/j.cell.2022.07.028>
- 528 35 Niwa, H. & Mwalilino, L. Ensemble of old and new techniques escorts ESCs to bona fide embryo-  
529 like structures. *Cell Stem Cell* **29**, 1423-1425 (2022). <https://doi.org/10.1016/j.stem.2022.09.004>
- 530 36 Viukov, S. *et al.* Human primed and naive PSCs are both able to differentiate into trophoblast stem  
531 cells. *Stem Cell Reports* **17**, 2484-2500 (2022). <https://doi.org/10.1016/j.stemcr.2022.09.008>
- 532 37 Yan, L. *et al.* Single-cell RNA-Seq profiling of human preimplantation embryos and embryonic stem  
533 cells. *Nature Structural and Molecular Biology* **20**, 1131-1139 (2013).  
534 <https://doi.org/10.1038/nsmb.2660>
- 535 38 Blakeley, P. *et al.* Defining the three cell lineages of the human blastocyst by single-cell RNA-seq.  
536 *Development (Cambridge)* **142**, 3613-3613 (2015). <https://doi.org/10.1242/dev.131235>
- 537 39 Petropoulos, S. *et al.* Single-Cell RNA-Seq Reveals Lineage and X Chromosome Dynamics in  
538 Human Preimplantation Embryos. *Cell* **165**, 1012-1026 (2016).  
539 <https://doi.org/10.1016/j.cell.2016.03.023>
- 540 40 Zhou, F. *et al.* Reconstituting the transcriptome and DNA methylome landscapes of human  
541 implantation. *Nature* **572**, 660-664 (2019). <https://doi.org/10.1038/s41586-019-1500-0>
- 542 41 Aibar, S. *et al.* SCENIC: single-cell regulatory network inference and clustering. *Nature Methods*  
543 **14**, 1083-1086 (2017). <https://doi.org/10.1038/nmeth.4463>
- 544 42 Wamaita, S. E. *et al.* Gata6 potently initiates reprogramming of pluripotent and differentiated cells  
545 to extraembryonic endoderm stem cells. *Genes & Development* **29**, 1239-1255 (2015).  
546 <https://doi.org/10.1101/gad.257071.114>
- 547 43 Séguin, C. A., Draper, J. S., Nagy, A. & Rossant, J. Establishment of Endoderm Progenitors by  
548 SOX Transcription Factor Expression in Human Embryonic Stem Cells. *Cell Stem Cell* **3**, 182-195  
549 (2008). <https://doi.org/10.1016/j.stem.2008.06.018>
- 550 44 Krendl, C. *et al.* GATA2/3-TFAP2A/C transcription factor network couples human pluripotent stem  
551 cell differentiation to trophectoderm with repression of pluripotency. *Proceedings of the National*  
552 *Academy of Sciences of the United States of America* **114**, E9579-E9588 (2017).  
553 <https://doi.org/10.1073/pnas.1708341114>
- 554 45 Schep, A. N., Wu, B., Buenrostro, J. D. & Greenleaf, W. J. chromVAR: inferring transcription-factor-  
555 associated accessibility from single-cell epigenomic data. *Nat Methods* **14**, 975-978 (2017).  
556 <https://doi.org/10.1038/nmeth.4401>
- 557 46 Amadei, G. *et al.* Inducible Stem-Cell-Derived Embryos Capture Mouse Morphogenetic Events  
558 In Vitro. *Developmental Cell* **56**, 366-382.e369 (2021).  
559 <https://doi.org/10.1016/j.devcel.2020.12.004>
- 560 47 Sozen, B. *et al.* Self-assembly of embryonic and two extra-embryonic stem cell types into  
561 gastrulating embryo-like structures. *Nature Cell Biology* **20**, 979-989 (2018).  
562 <https://doi.org/10.1038/s41556-018-0147-7>

- 563 48 Harrison, S. E., Sozen, B., Christodoulou, N., Kyprianou, C. & Zernicka-Goetz, M. Assembly of  
564 embryonic and extraembryonic stem cells to mimic embryogenesis in vitro. *Science* **356** (2017).  
565 <https://doi.org/10.1126/science.aal1810>
- 566 49 Zeevaert, K., Elsafi Mabrouk, M. H., Wagner, W. & Goetzke, R. Cell Mechanics in Embryoid Bodies.  
567 *Cells* **9** (2020). <https://doi.org/10.3390/cells9102270>
- 568 50 Abe, K. *et al.* Endoderm-specific gene expression in embryonic stem cells differentiated to  
569 embryoid bodies. *Exp Cell Res* **229**, 27-34 (1996). <https://doi.org/10.1006/excr.1996.0340>
- 570 51 Kiselev, V. Y., Yiu, A. & Hemberg, M. scmap: projection of single-cell RNA-seq data across data  
571 sets. *Nat Methods* **15**, 359-362 (2018). <https://doi.org/10.1038/nmeth.4644>
- 572 52 Tyser, R. C. V. *et al.* Single-cell transcriptomic characterization of a gastrulating human embryo.  
573 *Nature* **600**, 285-289 (2021). <https://doi.org/10.1038/s41586-021-04158-y>
- 574 53 Ma, H. *et al.* In vitro culture of cynomolgus monkey embryos beyond early gastrulation. *Science*  
575 **366** (2019). <https://doi.org/10.1126/science.aax7890>
- 576 54 Yang, R. *et al.* Amnion signals are essential for mesoderm formation in primates. *Nature*  
577 *Communications* **12** (2021). <https://doi.org/10.1038/s41467-021-25186-2>
- 578 55 Nakamura, T. *et al.* A developmental coordinate of pluripotency among mice, monkeys and  
579 humans. *Nature* **537**, 57-62 (2016). <https://doi.org/10.1038/nature19096>
- 580 56 Li, C., Virgilio, M. C., Collins, K. L. & Welch, J. D. Multi-omic single-cell velocity models epigenome-  
581 transcriptome interactions and improves cell fate prediction. *Nat Biotechnol* (2022).  
582 <https://doi.org/10.1038/s41587-022-01476-y>
- 583 57 Chen, D. *et al.* Human Primordial Germ Cells Are Specified from Lineage-Primed Progenitors. *Cell*  
584 *Rep* **29**, 4568-4582 e4565 (2019). <https://doi.org/10.1016/j.celrep.2019.11.083>
- 585 58 Castillo-Venzor, A. *et al.* Origin and segregation of the human germline.  *biorxiv* (2022).  
586 <https://doi.org/10.1101/2022.07.06.498671>
- 587 59 Zheng, Y. *et al.* Single-cell analysis of embryoids reveals lineage diversification roadmaps of early  
588 human development. *Cell Stem Cell* **29**, 1402-1419 e1408 (2022).  
589 <https://doi.org/10.1016/j.stem.2022.08.009>
- 590 60 Jo, K. *et al.* Efficient differentiation of human primordial germ cells through geometric control  
591 reveals a key role for Nodal signaling. *Elife* **11** (2022). <https://doi.org/10.7554/eLife.72811>
- 592 61 Sasaki, K. *et al.* The Germ Cell Fate of Cynomolgus Monkeys Is Specified in the Nascent Amnion.  
593 *Developmental Cell* **39**, 169-185 (2016). <https://doi.org/10.1016/j.devcel.2016.09.007>
- 594 62 Pham, T. X. A. *et al.* Modeling human extraembryonic mesoderm cells using naive pluripotent stem  
595 cells. *Cell Stem Cell* **29**, 1346-1365.e1310 (2022).  
596 <https://doi.org/10.1016/j.stem.2022.08.001>
- 597 63 Hollnagel, A., Oehlmann, V., Heymer, J., Rütter, U. & Nordheim, A. Id genes are direct targets of  
598 bone morphogenetic protein induction in embryonic stem cells. *Journal of Biological Chemistry* **274**,  
599 19838-19845 (1999). <https://doi.org/10.1074/jbc.274.28.19838>
- 600 64 Munger, C. *et al.* Microgel culture and spatial identity mapping elucidate the signalling requirements  
601 for primate epiblast and amnion formation. *Development* **149** (2022).  
602 <https://doi.org/10.1242/dev.200263>
- 603 65 Efremova, M., Vento-Tormo, M., Teichmann, S. A. & Vento-Tormo, R. CellPhoneDB: inferring cell-  
604 cell communication from combined expression of multi-subunit ligand-receptor complexes. *Nature*  
605 *Protocols* **15**, 1484-1506 (2020). <https://doi.org/10.1038/s41596-020-0292-x>
- 606 66 Bergmann, S. *et al.* Spatial profiling of early primate gastrulation in utero. *Nature* (2022).  
607 <https://doi.org/10.1038/s41586-022-04953-1>
- 608 67 Luckett, W. P. Origin and differentiation of the yolk sac and extraembryonic mesoderm in presomite  
609 human and rhesus monkey embryos. *Am J Anat* **152**, 59-97 (1978).  
610 <https://doi.org/10.1002/aja.1001520106>
- 611 68 Rostovskaya, M., Stirparo, G. G. & Smith, A. Capacitation of human naïve pluripotent stem cells  
612 for multi-lineage differentiation. *Development (Cambridge)* **146** (2019).  
613 <https://doi.org/10.1242/dev.172916>
- 614 69 Chhabra, S. & Warmflash, A. BMP-treated human embryonic stem cells transcriptionally resemble  
615 amnion cells in the monkey embryo. *Biology Open* **10** (2021). <https://doi.org/10.1242/bio.058617>



617 **Tables**

618 **Table 1: List of primary antibodies used in this study**

| Target        | Species | Company                   | Catalogue #    | RRID        |
|---------------|---------|---------------------------|----------------|-------------|
| AP2-alpha     | Mouse   | Santa Cruz Biotechnology  | sc-12726       | AB_667767   |
| AP2-gamma     | Goat    | R&D Systems               | AF5059         | AB_2255891  |
| Brachyury     | Goat    | R&D Systems               | AF2085         | AB_2200235  |
| CDX2          | Mouse   | BioGenex                  | MU392-UC       | AB_2335627  |
| Cerberus 1    | Goat    | R&D Systems               | AF1075         | AB_2077228  |
| Cytokeratin 7 | Mouse   | Agilent                   | M7018          | AB_2134589  |
| E-Cadherin    | Mouse   | BD Biosciences            | 610182         | AB_39581    |
| EOMES         | Rabbit  | Abcam                     | ab23345        | AB_778267   |
| FOXA2         | Goat    | R&D Systems               | AF2400         | AB_2294104  |
| FOXF1         | Rabbit  | ThermoFisher Scientific   | PA5-50516      | AB_2607993  |
| GATA3         | Goat    | Abcam                     | ab199428       | AB_2819013  |
| GATA6         | Goat    | R&D Systems               | AF1700         | AB_2108901  |
| GATA6         | Rabbit  | Cell Signaling Technology | 5851           | AB_10705521 |
| GFP           | Chicken | Abcam                     | ab13970        | AB_300798   |
| GFP           | Rat     | Nacalai USA               | GF090R         | AB_2314545  |
| HAND1         | Mouse   | DSHB                      | PCRP-HAND1-2A9 | AB_2618668  |
| ISL1          | Mouse   | DSHB                      | PCRP-ISL1-1A9  | AB_2618775  |
| N-Cadherin    | Mouse   | Abcam                     | ab98952        | AB_10696943 |
| NANOG         | Rabbit  | Cell Signaling Technology | 4903           | AB_10559205 |
| OCT3/4        | Mouse   | Santa Cruz Biotechnology  | sc-5279        | AB_628051   |
| OTX2          | Goat    | R&D Systems               | AF1979         | AB_2157172  |
| phosp-Smad1/5 | Rabbit  | Cell Signaling Technology | 9516S          | AB_491015   |
| Smad2/3       | Rabbit  | Cell Signaling Technology | 8685S          | AB_10889933 |
| SOX17         | Goat    | R&D Systems               | AF1924         | AB_355060   |
| SOX2          | Rat     | ThermoFisher Scientific   | 14-9811-82     | AB_11219471 |
| TBX20         | Mouse   | R&D Systems               | MAB8124        | AB_2255728  |
| VTCN1         | Rabbit  | Abcam                     | ab209242       | AB_2801513  |

619

620

621 **Table 2: List of primers used in this study**

| Primer         | Sequence              |
|----------------|-----------------------|
| qPCR_GATA6_Fwd | CTCAGTTCCTACGCTTCGCAT |
| qPCR_GATA6_Rev | GTCGAGGTCAAGTGAACAGCA |
| qPCR_SOX17_Fwd | TTCGTGTGCAAGCCTGAGAT  |



|                  |                                                              |
|------------------|--------------------------------------------------------------|
| qPCR_SOX17_Rev   | TAATATACCGCGGAGCTGGC                                         |
| qPCR_PDGFRA_Fwd  | TGGCAGTACCCCATGTCTGAA                                        |
| qPCR_PDGFRA_Rev  | CCAAGACCGTCACAAAAGGC                                         |
| qPCR_GATA4_Fwd   | CGACACCCCAATCTCGATATG                                        |
| qPCR_GATA4_Rev   | GTTGCACAGATAGTGACCCGT                                        |
| qPCR_CER1_Fwd    | ACAGTGCCCTTCAGCCAGACT                                        |
| qPCR_CER1_Rev    | ACAACTACTTTTTACAGCCTTCGT                                     |
| qPCR_COL4A1_Fwd  | GGGATGCTGTTGAAAGGTGAA                                        |
| qPCR_COL4A1_Rev  | GGTGGTCCGGTAAATCCTGG                                         |
| qPCR_SOX2_Fwd    | GAGCTTTGCAGGAAGTTTGC                                         |
| qPCR_SOX2_Rev    | GCAAGAAGCCTCTCCTTGAA                                         |
| qPCR_CD48_Fwd    | AGGTTGGGATTCGTGTCTGG                                         |
| qPCR_CD48_Rev    | AGTTGTTTGTAGTTCTCAGGCAG                                      |
| qPCR_GATA3_Fwd   | GCCCCTCATTAAGCCCAAG                                          |
| qPCR_GATA3_Rev   | TTGTGGTGGTCTGACAGTTCCG                                       |
| qPCR_TFAP2C_Fwd  | TGCACGATCAGACAGTCATTC                                        |
| qPCR_TFAP2C_Rev  | GTAGAGCTGAGGAGCGACAATC                                       |
| qPCR_GATA2_Fwd   | ACTGACGGAGAGCATGAAGAT                                        |
| qPCR_GATA2_Rev   | CCGGCACATAGGAGGGGTA                                          |
| qPCR_TFAP2A_Fwd  | AGGTCAATCTCCCTACACGAG                                        |
| qPCR_TFAP2A_Rev  | GGAGTAAGGATCTTGCGACTGG                                       |
| qPCR_TACSTD2_Fwd | ACAACGATGGCCTCTACGAC                                         |
| qPCR_TACSTD2_Rev | AGTTCACGCACCAGCACAC                                          |
| qPCR_KRT19_Fwd   | ACCTGGAGATGCAGATCGAA                                         |
| qPCR_KRT19_Rev   | AATCCACCTCCACACTGACC                                         |
| qPCR_GABRP_Fwd   | TTTCTCAGGCCCAATTTTCT                                         |
| qPCR_GABRP_Rev   | GCTGTCCGAGGTATATGGTGG                                        |
| qPCR_ISL1_Fwd    | GCGGAGTGTAAATCAGTATTTGGA                                     |
| qPCR_ISL1_Rev    | GCATTTGATCCCGTACAACCT                                        |
| TFAP2C-AttB_Fwd  | GGGGACAAGTTTGTACAAAAAAGCAGGCTTCACCATGTTGTGGA<br>AAATAACCGATA |
| TFAP2C-AttB_Rev  | GGGGACCACTTTGTACAAGAAAGCTGGGTCTTATTTCTGTGTT<br>TCTCCATT      |
| SOX17-AttB_Fwd   | GGGGACAAGTTTGTACAAAAAAGCAGGCTTCACCATGAGCAGCC<br>CGGATGC      |
| SOX17-AttB_Rev   | GGGGACCACTTTGTACAAGAAAGCTGGGTCTCACACGTCAGGAT<br>AGTTGCAG     |

623 **Methods**

624 *Ethics Statement*

625 Work with human embryonic stem cells (Shef6) was carried out with approval from the UK  
626 Human Stem Cell Bank Steering Committee under approval SCSC21-38 and adheres to the  
627 regulations of the UK Code of Practice for Use of Human Stem Cell Lines. Human embryo work  
628 was regulated by the Human Fertility and Embryology Authority (HFEA) and carried out under  
629 license R0193. Ethical approval was obtained from the Human Biology Research Ethics  
630 Committee at the University of Cambridge (reference HBREC.2021.26). IVF patients at CARE  
631 Fertility, Bourn Hall Fertility and Herts & Essex Fertility Clinics were provided project-specific  
632 information at the end of their treatment. All patients were offered counselling, received no  
633 financial benefit, and could withdraw their participation at any time until the embryo had been  
634 used for research. Embryos were not cultured beyond 14 d.p.f. or the first appearance of the  
635 primitive streak.

636

637 *hESC culture*

638 Shef6 human ESCs were cultured on Matrigel-coated plates in mTESR medium (05825,  
639 STEMCELL Technologies) at 37°C, 20% O<sub>2</sub>, 5% CO<sub>2</sub>. Plates were coated with 1.6% growth-  
640 factor reduced Matrigel (356230, BD Biosciences) dissolved in DMEM/F12 (21331-020, Life  
641 Technologies) for 1 hour at at 37°C. hESCs were passaged with TrypLE (12604013,  
642 ThermoFisher Scientific). For the first 24 hours after passaging, 10µM ROCK inhibitor Y-27632  
643 (72304, STEMCELL Technologies) was added. Medium was changed every 24 hours. Cells were  
644 routinely tested for mycoplasma contamination by PCR (6601, Takara Bio). To convert primed  
645 hESCs to RSeT or PXGL culture conditions, cells were passaged to mitomycin-C inactivated CF-  
646 1 MEFs (3x10<sup>3</sup> cells/cm<sup>2</sup>; GSC-6101G, Amsbio) in media consisting of DMEM/F12 with 20%  
647 Knockout Serum Replacement (10828010, ThermoFisher Scientific), 100µM β-mercaptoethanol  
648 (31350-010, Thermo Fisher Scientific), 1x GlutaMAX (35050061, Thermo Fisher Scientific), 1x

649 non-essential amino acids, 1x penicillin-streptomycin and 10ng/ml FGF2 (Department of  
650 Biochemistry, University of Cambridge) and 10 $\mu$ M ROCK inhibitor Y-27632 (72304, STEMCELL  
651 Technologies). For RSeT cells, media was switched to RSeT media after 24 hours (05978,  
652 STEMCELL Technologies). Cells were maintained in RSeT and passaged as above every 4-5  
653 days. For PXGL cells, conversion was performed as previously described<sup>1</sup>. Briefly, cells were  
654 cultured in 5% O<sub>2</sub>, 7% CO<sub>2</sub> and media was switched to chemical resetting media 1 (cRM-1)  
655 consisting of N2B27 media supplemented with 1 $\mu$ M PD0325901 (University of Cambridge, Stem  
656 Cell Institute), 10ng/mL human recombinant LIF (300-05, PeproTech), and 1mM Valproic Acid.  
657 N2B27 contains 1:1 DMEM/F12 and Neurobasal A (10888-0222, Thermo Fisher Scientific)  
658 supplemented with 0.5x B27 (10889-038, Thermo Fisher Scientific), 0.5x N2 (made in house),  
659 100 $\mu$ M  $\beta$ -mercaptoethanol, 1x GlutaMAX and 1x penicillin-streptomycin. cRM-1 media was  
660 changed every 48h for 4 days, after which media was changed to PXGL. PXGL media consists  
661 of N2B27 supplemented with 1 $\mu$ M PD0325901, 10ng/mL human recombinant LIF, 2 $\mu$ M Gö6983  
662 (2285, Tocris) and 2 $\mu$ M XAV939 (X3004, Merck). PXGL cells were passaged every 4-6 days  
663 using TrypLE (12604013, Thermo Fisher Scientific) for 3 min. 10 $\mu$ M ROCK inhibitor Y-27632 and  
664 1 $\mu$ L/cm<sup>2</sup> Geltrex (A1413201, Thermo Fisher Scientific) were added at passage for 24 hours. For  
665 yolk sac-like cell or trophoblast differentiation, RSeT cells were passaged onto matrigel coated  
666 IBIDI chamber slides. 24 hours later, media was switched to 'ACL' (100ng/ml Activin-A, Qk001,  
667 QKINE, 3 $\mu$ M CHIR99021, 72052, STEMCELL Technologies, and 10ng/ml human LIF) for  
668 hypoblast induction or 'PA' (1 $\mu$ M PD0325901 and 1 $\mu$ M A83-01, 72022, STEMCELL  
669 Technologies) with or without 500nM lysophosphatidic acid – LPA (3854, Tocris).

670

#### 671 *Generation of Inducible hESC lines*

672 To generate Piggyback plasmids, full length coding sequences were amplified from human cell  
673 line cDNA with AttB overhangs using Phusion High-Fidelity DNA polymerase (M0530S, New

674 England BioLabs) according to manufacturer's instructions. Amplicons were introduced to  
675 pDONR221 entry plasmids using BP clonase (11789100, ThermoFisher Scientific), and  
676 subsequently to destination plasmids using LR clonase (11791020, ThermoFisherScientific)  
677 according to manufacturer's instructions. hESCs were electroporated with GATA6-3XFLAG-  
678 TetOn-Zeo (entry plasmid 72922, Addgene) and/or SOX17-TetOn-Hygro or GATA3-EGFP-TetO-  
679 Hygro (Gift from Dr. Mika Drukker) and/or TFAP2C-TetOn-G418 in addition to PB-CAG-rTTA3-  
680 Bsd or PB-CAG-rTTA3-Zeo and pBase plasmid expressing PiggyBac Transposase using the  
681 Neon transfection system with the following settings: 1200V, 2 ms, 2 pulses. Two days after  
682 transfection, antibiotics were applied at a ¼ dosage and increased to final concentrations of  
683 100µg/mL zeocin (ant-zn-1, Invitrogen), 20µg/mL blasticidin (A113903, ThermoFisher Scientific),  
684 50µg/mL G418 (10131035, ThermoFisher Scientific) or 50µg/mL HygromycinB (10687010,  
685 ThermoFisher Scientific). Clones were generated by manually picking single colonies under a  
686 dissecting microscope. Transgene activation was triggered by addition of 1µg/mL doxycycline  
687 hyclate (D9891, Sigma). Note that AP2γ-inducible cells failed to reset in PXGL naïve conditions.

688

#### 689 *qRT-PCR Analysis*

690 Cell pellets were harvested and RNA was extracted using the Qiagen RNeasy kit following  
691 manufacturer's instructions. Reverse Transcriptase reaction was performed with 1µg RNA with  
692 random primers (C1181, Promega), dNTPs (N0447S, New England BioLabs), RNase inhibitor  
693 (M0314L, New England Biolabs, and M-MuLV reverse transcriptase (M0253L, New England  
694 Biolabs). RT-qPCR was performed using Power SYBR Green PCR Master Mix (4368708,  
695 ThermoFisher Scientific) on a Step One Plus Real-Time PCR machine (Applied Biosystems). The  
696 following program was used: 10 minutes at 95°C followed by 40 cycles of 15s at 95°C and 1  
697 minute at 60°C. Single melt curves were observed for all primers used in this study.

698

#### 699 *Generation of Inducible Human Embryoids*

700 To generate the three-dimensional stem cell-derived model of the post-implantation embryo,  
701 RSeT cells between 2 and 6 passages post-conversion to RSeT media were passaged as normal;  
702 the following day (Day -3) the media for extraembryonic-like cells (induced GATA6, induced  
703 GATA6-SOX17 or induced GATA3-AP2 $\gamma$ ) was changed to N2B27 with 5% Knockout Serum  
704 Replacement and 1 $\mu$ g/mL DOX. This media was refreshed every 24 hours for 3 days. On day 0  
705 (the day of aggregation), an Aggrewell dish (34415, STEMCELL Technologies) was prepared by  
706 pre-coating with anti-adherence solution (07010, STEMCELL Technologies) and centrifuging at  
707 2000g for 5 minutes. Wells were washed twice with PBS prior to the addition of experiment media.  
708 This media consists of N2B27 with 5% knockout serum replacement, 1 $\mu$ g/mL doxycycline and  
709 10 $\mu$ M Y-27632. Induced cells and wild type ESCs were enzymatically dissociated 1 hour after  
710 addition of 10 $\mu$ M Y-27632 to wells containing cells for inducible human embryoid generation.  
711 Dissociated cells were pelleted and resuspended in experiment media and placed in gelatin-  
712 coated wells for MEF depletion. After 15-30 minutes cells were counted, mixed, and plated into  
713 an Aggrewell dish with a final calculation of 8 wildtype-ESC, 8 hypoblast-like and 16 trophoblast-  
714 like cells plated per microwell in the Aggrewell. On day 1, the media was subjected to two two-  
715 third changes of N2B27 with 5% knockout serum replacement and 1 $\mu$ g/mL doxycycline. On day  
716 2, Aggrewells were subjected to a half change with hIVC1 media with 1.25  $\mu$ g/mL hIGF1 (78022.1  
717 STEMCELL Technologies) and 1 $\mu$ g/mL doxycycline. hIVC1 media consists of Advanced  
718 DMEM/F12 (12634-010 ThermoFisher Scientific) supplemented with 20% inactivated FBS  
719 (10270106, ThermoFisher Scientific), 1x Glutamax, 1X NEAA, 1x Essential AA, 1x ITS-X, 25U/mL  
720 Pen/Strep, 1.8mM Glucose (G8644, Sigma-Aldrich), 0.22% sodium lactate (L7900, Sigma-  
721 Aldrich), 8nM  $\beta$ -estradiol (50-28-2, Tocris) and 200ng/mL progesterone (P0130, Sigma-Aldrich).  
722 This media is used in half changes each day from day 3. On day 4, aggregates were manually  
723 picked using a mouth pipette under a dissecting microscope into individual wells of ultra-low  
724 attachment 96 well plates (CLS7007, Corning) in hIVC1 media with IGF1 and doxycycline as  
725 above for subsequent culture.

726

727 *Immunostaining and image analysis*

728 Samples were washed with phosphate-buffered saline (PBS) and fixed in 4% Paraformaldehyde  
729 (PFA; 1710, Electron Microscopy Sciences) at room temperature for 20 minutes. Samples were  
730 washed 3 times with PBS + 0.1% (vol/vol) Tween-20 (PBST) and incubated with 0.3% (vol/vol)  
731 Triton X-100 (T8787, Sigma Aldrich) + 0.1mM glycine (BP381-1, ThermoFisher Scientific) in PBS  
732 at room temperature for 30 minutes. Samples were blocked in blocking buffer (PBST with 5%  
733 (w/vol) BSA, A9418, Sigma), then incubated with primary antibodies diluted in blocking buffer  
734 overnight at 4°C. See table 1 for a list of primary antibodies. Samples were washed three times  
735 in PBST and incubated with fluorescently conjugated AlexaFlour secondary antibodies  
736 (ThermoFisher Scientific, 1:500) and DAPI (D3571, ThermoFisher Scientific, 1µg/ml) diluted in  
737 blocking buffer for 2 hours at room temperature. For pSMAD1.5 quantification, OCT4-positive or  
738 GATA6-positive nuclei were isolated and the fluorescent intensity of pSMAD1.5 was quantified.  
739 For SMAD2.3 quantification, OCT4-positive or GATA6-positive (excluding the outermost GFP+  
740 cell layer) nuclei fluorescence intensity was quantified, as well as cytoplasmic fluorescence  
741 intensity. Data is presented as the ratio of nuclear:cytoplasmic fluorescence intensity.  
742 Immunofluorescence images were analyzed using FIJI.

743

744 *Human Embryo Thawing and Culture*

745 Human embryos were thawed and cultured as described previously<sup>2,3</sup>. Briefly, cryopreserved  
746 human blastocysts (5 or 6 d.p.f.) were thawed using the Kitazato thaw kit (VT8202-2, Hunter  
747 Scientific) according to the manufacturer's instructions. The day prior to thawing, TS solution was  
748 placed at 37°C overnight. The next day, IVF straws were submerged in 1mL pre-warmed TS for  
749 1 min. Embryos were then transferred to DS for 3 min, WS1 for 5 min, and WS2 for 1 min. These  
750 steps were performed in reproplates (REPROPLATE, Hunter Scientific) using a STRIPPER  
751 micropipette (Origio). Embryos were incubated at 37°C and 5% CO<sub>2</sub> in normoxia and in pre-



752 equilibrated human IVC1 supplemented with 50ng/mL Insulin Growth Factor-1 (IGF1) (78078,  
753 STEMCELL Technologies) under mineral oil for 1-4h to allow for recovery. Following thaw,  
754 blastocysts were briefly treated with acidic Tyrode's solution (T1788, Sigma) to remove the zona  
755 pellucida and placed in pre-equilibrated human IVC1 in 8 well  $\mu$ -slide tissue culture plates (80826,  
756 Ibidi) in approximately 400  $\mu$ L volume per embryo per well. Half media changes were done every  
757 24 hours.

758

### 759 *Statistics*

760 Statistical analyses were performed using Graphpad Prism 9. Sample sizes were not  
761 predetermined, and the authors were not blinded to conditions. All experiments were performed  
762 independently at least twice. Within plots, all data is presented as mean  $\pm$  SEM.

763

### 764 *Collection, Generation and Sequencing of single-nuclei ATAC/RNA 10x Libraries*

765 To collect post-implantation embryo models for single-cell sequencing, correctly organized  
766 embryoids at day 4, 6 and 8 were picked visually and washed through PBS twice in a 4-well dish  
767 before transfer to TrypLE. Samples were agitated by pipetting every 5 minutes for 10-20 minutes  
768 until dissociated. Enzymatic activity was inactivated through addition of 20% FBS in PBS at 2x  
769 volume. Cells were collected in a falcon tube, pelleted, and resuspended in freeze buffer  
770 consisting of 50 mM Tris at pH 8.0 (15-567-027, Fisher Scientific), 25% glycerol (G5516, Sigma-  
771 Aldrich), 5 mM Mg(OAc)<sub>2</sub> (63052, Sigma-Aldrich), 0.1mM EDTA (15575020, ThermoFisher  
772 Scientific), 5mM DTT (R0861, ThermoFisher Scientific), 1x protease inhibitor cocktail (P8340,  
773 Sigma-Aldrich), 1:2500 dilution of superasin (AM2694, Invitrogen). For cell lines, 10,000 cells  
774 were counted, pelleted, and resuspended in the freeze media above before slowfreezing at -80°C.

775

776 For nuclei isolation and library construction, low input nuclei isolation protocol from 10x Genomics  
777 was performed. Briefly, frozen cell pellets were thawed in a 37°C water bath for 30 seconds,

778 centrifuged (500g for 5 minutes at 4°C) to pellet the cells then the supernatant were aspirated.  
779 The cell pellets were washed with 200 µl 1x PBS with 0.04% BSA twice, centrifuged, and  
780 supernatant was aspirated between washes. Subsequently, chilled lysis buffer (45 µl per sample)  
781 was added to the washed cell pellet and placed on ice for 3 minutes, then wash buffer (50 µl per  
782 sample) was added. Washed isolated nuclei were resuspended in a diluted nuclei buffer. In this  
783 study, the isolated nuclei were resuspended in 5 µl of diluted nuclei buffer and were directly added  
784 to the transposition reaction. In all following steps, 10x Genomics' Single Cell Multiome ATAC  
785 and Gene expression protocol were followed according to manufacturer's specifications and  
786 guidelines. The final libraries were loaded on the NextSeq 2000 using P2 100 cycle kit at 650 pM  
787 loading concentration with paired end sequencing following the recommended sequencing reads  
788 from 10x Genomics (28/10/10/90 cycles for gene expression libraries and 50/8/24/49 cycles for  
789 ATAC libraries).

790

### 791 *Single Cell Sequencing Analysis*

#### 792 Processing and Quality Control

793 Raw reads were analyzed using the CellRangerARC pipeline to generate ATAC and RNA fastq  
794 files for each sample, and then to align genomic and transcriptomic reads. Matrices were then  
795 read into Seurat<sup>4</sup> and Signac<sup>5</sup> using the Read10X\_h5 command. For ATAC-seq data, peaks from  
796 standard chromosomes were used and peaks were additionally called using macs2 to add an  
797 additional Signac assay. Cells with >500 RNA UMI counts, <20% mitochondrial reads, >500  
798 ATAC reads, TSS enrichment >1 and were called as singlets using scDbIFinder<sup>6</sup> were retained  
799 for downstream analysis. For UMAP projections, SCTransform was used for RNA counts with  
800 percent mitochondrial counts and cell cycle scores regressed. PCA and LSI graphs were used to  
801 generate a weighted nearest neighbor (wnn) embedding which accounts for both modalities.  
802 chromVAR<sup>7</sup> was run to calculate motif accessibility score on the peaks assay.

803

#### 804 Comparisons to Published Datasets

805 scmap<sup>8</sup> was used to project cell labels from other single cell datasets onto post-implantation  
806 embryo model transcriptional data. All reference data used was publicly available with published  
807 cell type annotations. Cynomolgus monkey gene names were converted to hgnc gene symbols  
808 using biomaRt. For data generated with smart-seq2 or other non-UMI-based single cell  
809 sequencing methods, the scmapCluster method was used with a similarity threshold of 0.5. For  
810 UMI-based methods the scmapCell followed by scmapCell2Cluster method was used with  $w=2$ .  
811 Upon cell type assignment and processing for the cell lines sequenced, a logistic regression  
812 framework was applied to project cell line data onto published single cell data and to project  
813 published cluster annotations onto post-implantation embryo model clusters, resulting in a  
814 quantitative measure of predicted similarities<sup>9</sup>. Here, only differentially expressed genes  
815 (produced using Seurat's FindAllMarkers function on course cell assignments (which collapsed  
816 amnion and mesodermal clusters) were used.

817

#### 818 Multivelo RNA/Chromatin Velocity

819 We applied a recently published method for velocity calculations that accounts for both single cell  
820 ATAC and RNA data<sup>10</sup>. Multivelo was run on all cells which passed the QC and processing  
821 described above. Analysis was based on available vignettes with 1000 highly variable genes and  
822 the 'grid' method.

823

#### 824 CellPhoneDB Analysis

825 CellPhoneDB 2.0 was used with default settings to assess potential tissue signaling crosstalk<sup>11</sup>.  
826 Course cell assignments which collapsed separated amnion (AM-1, AM-2, AM-3) and mesoderm  
827 (MESO-1, MESO-2) clusters was used for simplicity. Selected significant interactions were plotted  
828 as dot plots.

829

830 Reanalysis of human *in vitro* cultured embryo datasets

831 Previously published data from Yan et al., Blakely et al., Petropoulos et al., Zhou et al., and Xiang  
832 et al., were realigned to the hg38 human genome using kallisto or kb-bustools<sup>12,13</sup>. Datasets which  
833 were not sequenced with UMI-based technologies were normalized using quinnorm to quasi-  
834 umis<sup>14</sup>. Using SCTransform-based integration, datasets were combined to generate a single-cell  
835 RNA-seq dataset of human embryos spanning zygote to day 14 post-fertilization<sup>2,15-19</sup>. Cells were  
836 clustered and identities assigned based on previous annotations and canonical marker  
837 expression. SCENIC was used with default settings in R, and the AUC-regulon table used to  
838 generate a new assay in the Seurat object. Using this assay, the epiblast, hypoblast and  
839 trophoblast lineages were then compared using Seurat's FindMarkers function to identify  
840 predicted differentially active regulons. These factors were then plotted in relation to each other  
841 in Cytoscape.

842

843 Data Availability Statement

844 Data generated in this study is available under Gene Expression Omnibus accession code  
845 GSE218314. For the purpose of review this dataset can be accessed with the token  
846 ijkhciqzhubbqt.

847

848 Previously published data is publicly available:

849 Human data

850 Molè et al., 2021: ArrayExpress E-MTAB-8060

851 Xiang et al., 2020: Gene Expression Omnibus GSE136447

852 Zhou et al., 2019: Gene Expression Omnibus GSE109555

853 Petropoulos et al., 2016: ArrayExpress E-MTAB-3929

854 Blakely et al., 2015: Gene Expression Omnibus GSE66507

855 Yan et al., 2013: Gene Expression Omnibus GSE36552

856

857 Cynomolgus Monkey

858 Yang et al., 2021: Gene Expression Omnibus GSE148683

859 Ma et al., 2019: Gene Expression Omnibus GSE130114

860 Nakamura et al., 2016: Gene Expression Omnibus GSE74767

861

## 862 Code Availability Statement

863 Code to used to analyze these data is available at [https://github.com/bweatherbee/human\\_model](https://github.com/bweatherbee/human_model)

864 (to be made public upon publication)

865

## 866 **Methods References**

- 867 1 Bredenkamp, N. *et al.* Wnt Inhibition Facilitates RNA-Mediated Reprogramming of Human Somatic  
868 Cells to Naive Pluripotency. *Stem cell reports* **13**, 1083-1098 (2019).  
869 <https://doi.org/10.1016/j.stemcr.2019.10.009>
- 870 2 Molè, M. A. *et al.* A single cell characterisation of human embryogenesis identifies pluripotency  
871 transitions and putative anterior hypoblast centre. *Nature Communications* **12** (2021).  
872 <https://doi.org/10.1038/s41467-021-23758-w>
- 873 3 Shahbazi, M. N. *et al.* Self-organization of the human embryo in the absence of maternal tissues.  
874 *Nature Cell Biology* **18**, 700-708 (2016). <https://doi.org/10.1038/ncb3347>
- 875 4 Stuart, T. *et al.* Comprehensive Integration of Single-Cell Data. *Cell* **177**, 1888-1902.e1821 (2019).  
876 <https://doi.org/10.1016/j.cell.2019.05.031>
- 877 5 Stuart, T., Srivastava, A., Madad, S., Lareau, C. A. & Satija, R. Single-cell chromatin state analysis  
878 with Signac. *Nat Methods* **18**, 1333-1341 (2021). <https://doi.org/10.1038/s41592-021-01282-5>
- 879 6 Germain, P. L., Lun, A., Garcia Meixide, C., Macnair, W. & Robinson, M. D. Doublet identification  
880 in single-cell sequencing data using scDblFinder. *F1000Res* **10**, 979 (2021).  
881 <https://doi.org/10.12688/f1000research.73600.2>
- 882 7 Schep, A. N., Wu, B., Buenostro, J. D. & Greenleaf, W. J. chromVAR: inferring transcription-factor-  
883 associated accessibility from single-cell epigenomic data. *Nat Methods* **14**, 975-978 (2017).  
884 <https://doi.org/10.1038/nmeth.4401>
- 885 8 Kiselev, V. Y., Yiu, A. & Hemberg, M. scmap: projection of single-cell RNA-seq data across data  
886 sets. *Nat Methods* **15**, 359-362 (2018). <https://doi.org/10.1038/nmeth.4644>
- 887 9 Young, M. D. *et al.* Single-cell transcriptomes from human kidneys reveal the cellular identity of  
888 renal tumors. *Science* **361**, 594-599 (2018). <https://doi.org/10.1126/science.aat1699>
- 889 10 Li, C., Virgilio, M. C., Collins, K. L. & Welch, J. D. Multi-omic single-cell velocity models epigenome-  
890 transcriptome interactions and improves cell fate prediction. *Nat Biotechnol* (2022).  
891 <https://doi.org/10.1038/s41587-022-01476-y>
- 892 11 Efremova, M., Vento-Tormo, M., Teichmann, S. A. & Vento-Tormo, R. CellPhoneDB: inferring cell-  
893 cell communication from combined expression of multi-subunit ligand-receptor complexes. *Nature*  
894 *Protocols* **15**, 1484-1506 (2020). <https://doi.org/10.1038/s41596-020-0292-x>
- 895 12 Bray, N. L., Pimentel, H., Melsted, P. & Pachter, L. Near-optimal probabilistic RNA-seq  
896 quantification. *Nature Biotechnology* **34**, 525-527 (2016). <https://doi.org/10.1038/nbt.3519>



- 897 13 Melsted, P. *et al.* Modular, efficient and constant-memory single-cell RNA-seq preprocessing.  
898 *Nature Biotechnology* **39**, 813-818 (2021). [https://doi.org:10.1038/s41587-021-00870-2](https://doi.org/10.1038/s41587-021-00870-2)  
899 14 Townes, F. W. & Irizarry, R. A. Quantile normalization of single-cell RNA-seq read counts without  
900 unique molecular identifiers. *Genome Biology* **21** (2020). [https://doi.org:10.1186/s13059-020-](https://doi.org/10.1186/s13059-020-02078-0)  
901 [02078-0](https://doi.org/10.1186/s13059-020-02078-0)  
902 15 Yan, L. *et al.* Single-cell RNA-Seq profiling of human preimplantation embryos and embryonic stem  
903 cells. *Nature Structural and Molecular Biology* **20**, 1131-1139 (2013).  
904 [https://doi.org:10.1038/nsmb.2660](https://doi.org/10.1038/nsmb.2660)  
905 16 Blakeley, P. *et al.* Defining the three cell lineages of the human blastocyst by single-cell RNA-seq.  
906 *Development (Cambridge)* **142**, 3613-3613 (2015). [https://doi.org:10.1242/dev.131235](https://doi.org/10.1242/dev.131235)  
907 17 Petropoulos, S. *et al.* Single-Cell RNA-Seq Reveals Lineage and X Chromosome Dynamics in  
908 Human Preimplantation Embryos. *Cell* **165**, 1012-1026 (2016).  
909 [https://doi.org:10.1016/j.cell.2016.03.023](https://doi.org/10.1016/j.cell.2016.03.023)  
910 18 Zhou, F. *et al.* Reconstituting the transcriptome and DNA methylome landscapes of human  
911 implantation. *Nature* **572**, 660-664 (2019). [https://doi.org:10.1038/s41586-019-1500-0](https://doi.org/10.1038/s41586-019-1500-0)  
912 19 Xiang, L. *et al.* A developmental landscape of 3D-cultured human pre-gastrulation embryos. *Nature*  
913 **577**, 537-542 (2020). [https://doi.org:10.1038/s41586-019-1875-y](https://doi.org/10.1038/s41586-019-1875-y)

914

## 915 **Acknowledgements**

916 The authors are grateful to CARE Fertility, Herts and Essex Fertility Centre, Bourn Hall Fertility  
917 Clinic and King's Fertility Clinic for their collaboration in donation of supernumerary human  
918 embryos. The authors thank all members of the M.Z-G and Boroviak labs, Gianluca Amadei for  
919 thoughtful comments and Marta Shahbazi and David Glover for feedback on the manuscript. This  
920 work is supported by Wellcome Trust, Open Atlas and NOMIS award grants to M.Z-G, Allen  
921 Discovery Center for Cell Lineage Tracing grants to J.S. and M.Z-G., in addition to individual  
922 funding from the Gates Cambridge Trust (to B.A.T.W.) and Leverhulme Trust Early Career  
923 Fellowship (to C.W.G.). J.S. is an investigator of the Howard Hughes Medical Institute.

924

## 925 **Author Contributions**

926 B.A.T.W. and C.W.G. designed, carried out, and analyzed experiments. B.A.T.W., C.W.G. and  
927 L.K.I-S. performed human embryo work. N.H. and R.M.D. prepared 10x multiome libraries and  
928 performed RNA and ATAC sequencing supervised by J.S.. B.A.T.W. analyzed single-cell  
929 sequencing data. C.W.G. and B.A.T.W. wrote the manuscript with input from all co-authors. M.Z-  
930 G conceived and supervised the project.

931

932 **Declarations of Interests**

933 M.Z-G, B.A.T.W and C.W.G are inventors on a patent titled ‘Stem Cell Derived-Model of the

934 Human Embryo.”

935

## Extended Data Extended Figure 1

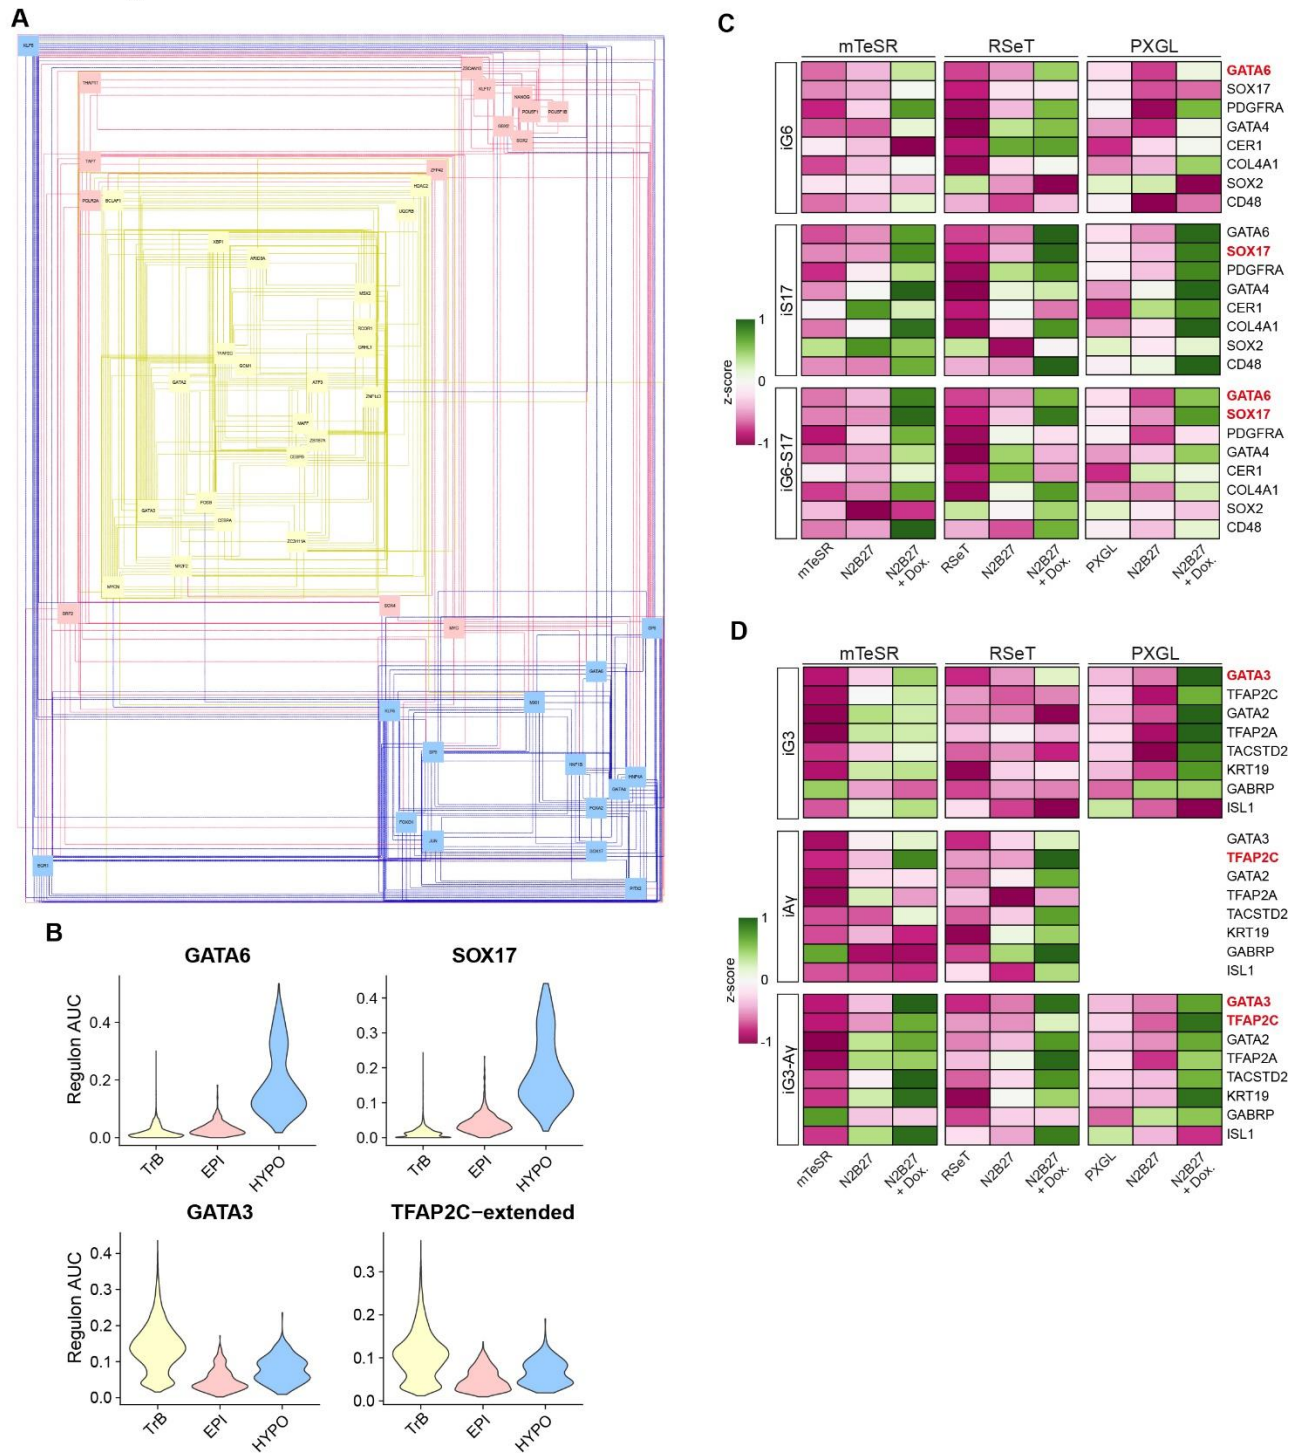

936

## Extended Figure 1 (related to Fig 1) – Sequencing analysis and gene regulatory network generation to guide transgene selection.

937

938

939

940

941

(A) Inferred epiblast, hypoblast and trophoblast gene regulatory network generated by SCENIC during peri-implantation human embryo development. See methods for details on datasets and processing. (B) Regulon activity scored by SCENIC for hypoblast markers GATA6, SOX17 and TrB markers GATA3 and TFAP2C. (C) qRT-PCR analysis after 3 days of doxycycline-induction of induced GATA6 (iG6), induced SOX17 (iS17) or induced GATA6-SOX17 (iG6-S17)

942 singly and together from three pluripotent states. N=3 technical replicates from 3 biological replicates. (D) qRT-PCR  
943 analysis after 3 days of DOX-induction of induced GATA3 (iG3), induced AP2 $\gamma$  (iA $\gamma$ ) or induced GATA3-AP2 $\gamma$  (iG3-A $\gamma$ )  
944 from multiple pluripotent starting states. N=3 technical replicates for 3 biological replicates. Note, for (C) and (D) the  
945 induced transgenes are marked in red.  
946

## Extended Figure 2

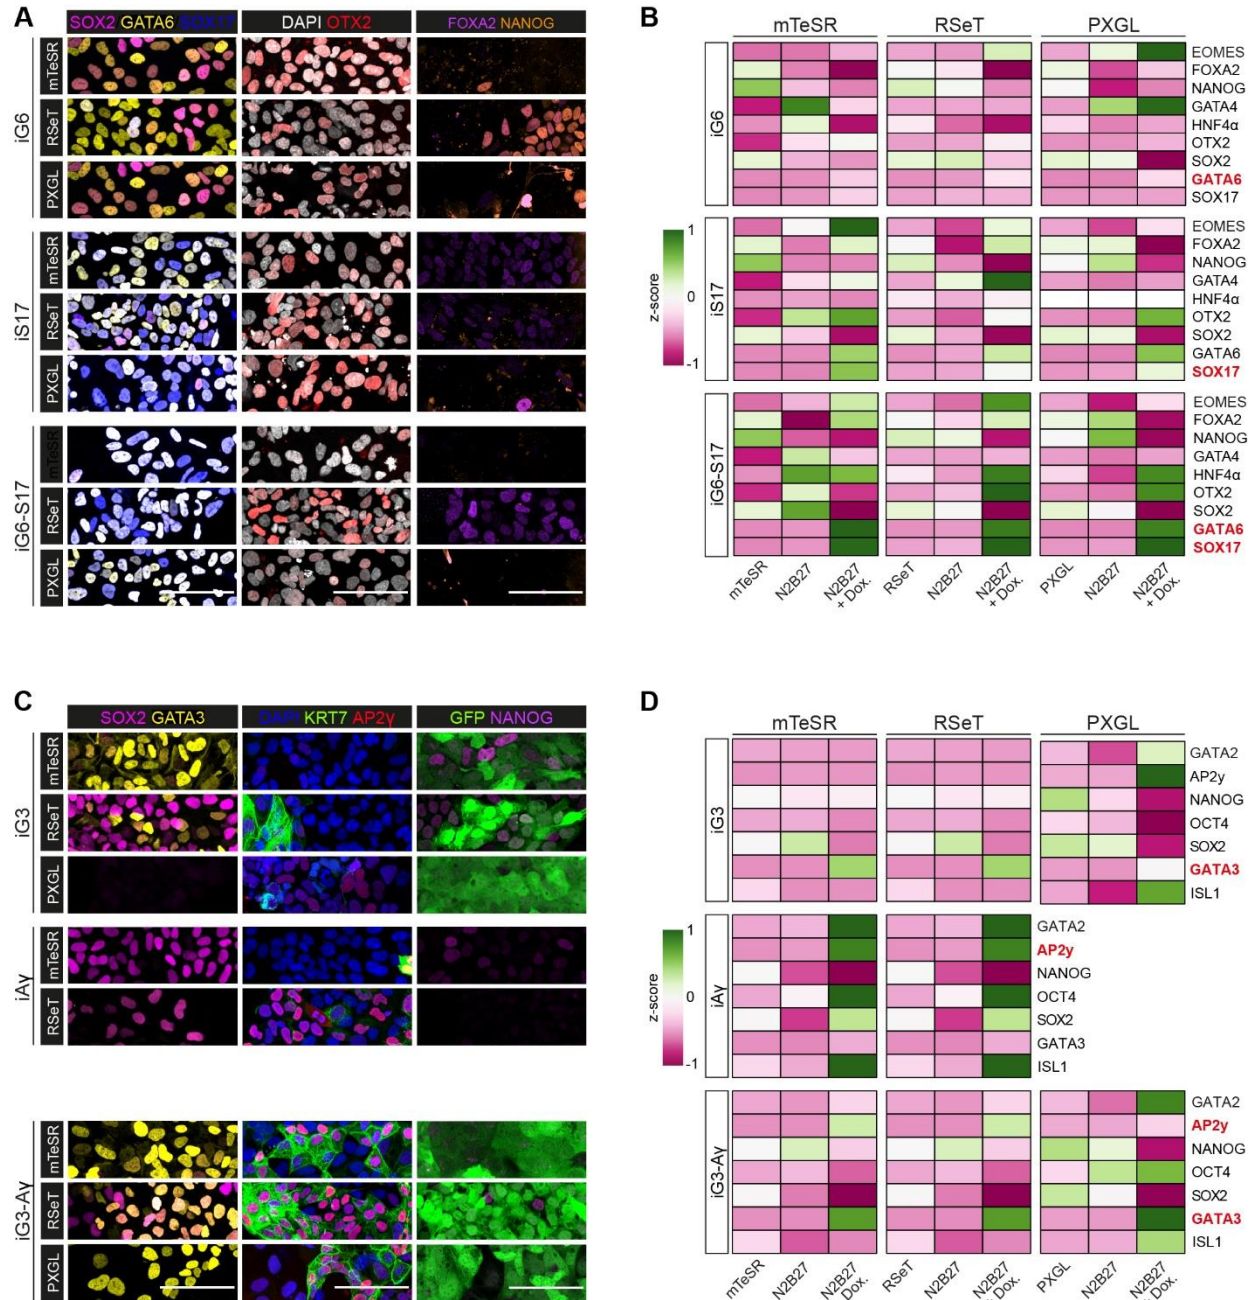

947

948

949

950 **Extended Figure 2 (related to Fig 1) – Immunofluorescence analysis of cardinal marker**

951 **genes of hypoblast and trophoblast after doxycycline induction across pluripotent states.**

952 (A) Immunofluorescence analysis of inducible GATA6 (iG6), inducible SOX17 (S17) or inducible GATA6-SOX17 (iG6-

953 S17) cells after 3 days induction from multiple pluripotent states. (B) Quantification of A. (C) Immunofluorescence

954 analysis of inducible GATA3 (iG3), inducible AP2γ (iAY) or inducible GATA3-AP2γ (iG3-AY) after 3 days induction from

955 multiple pluripotent states. Note, for (B) and (D) the induced transgenes are marked in red. For all, N=3 technical replicates from 2 independent experiments.



### Extended Figure 3

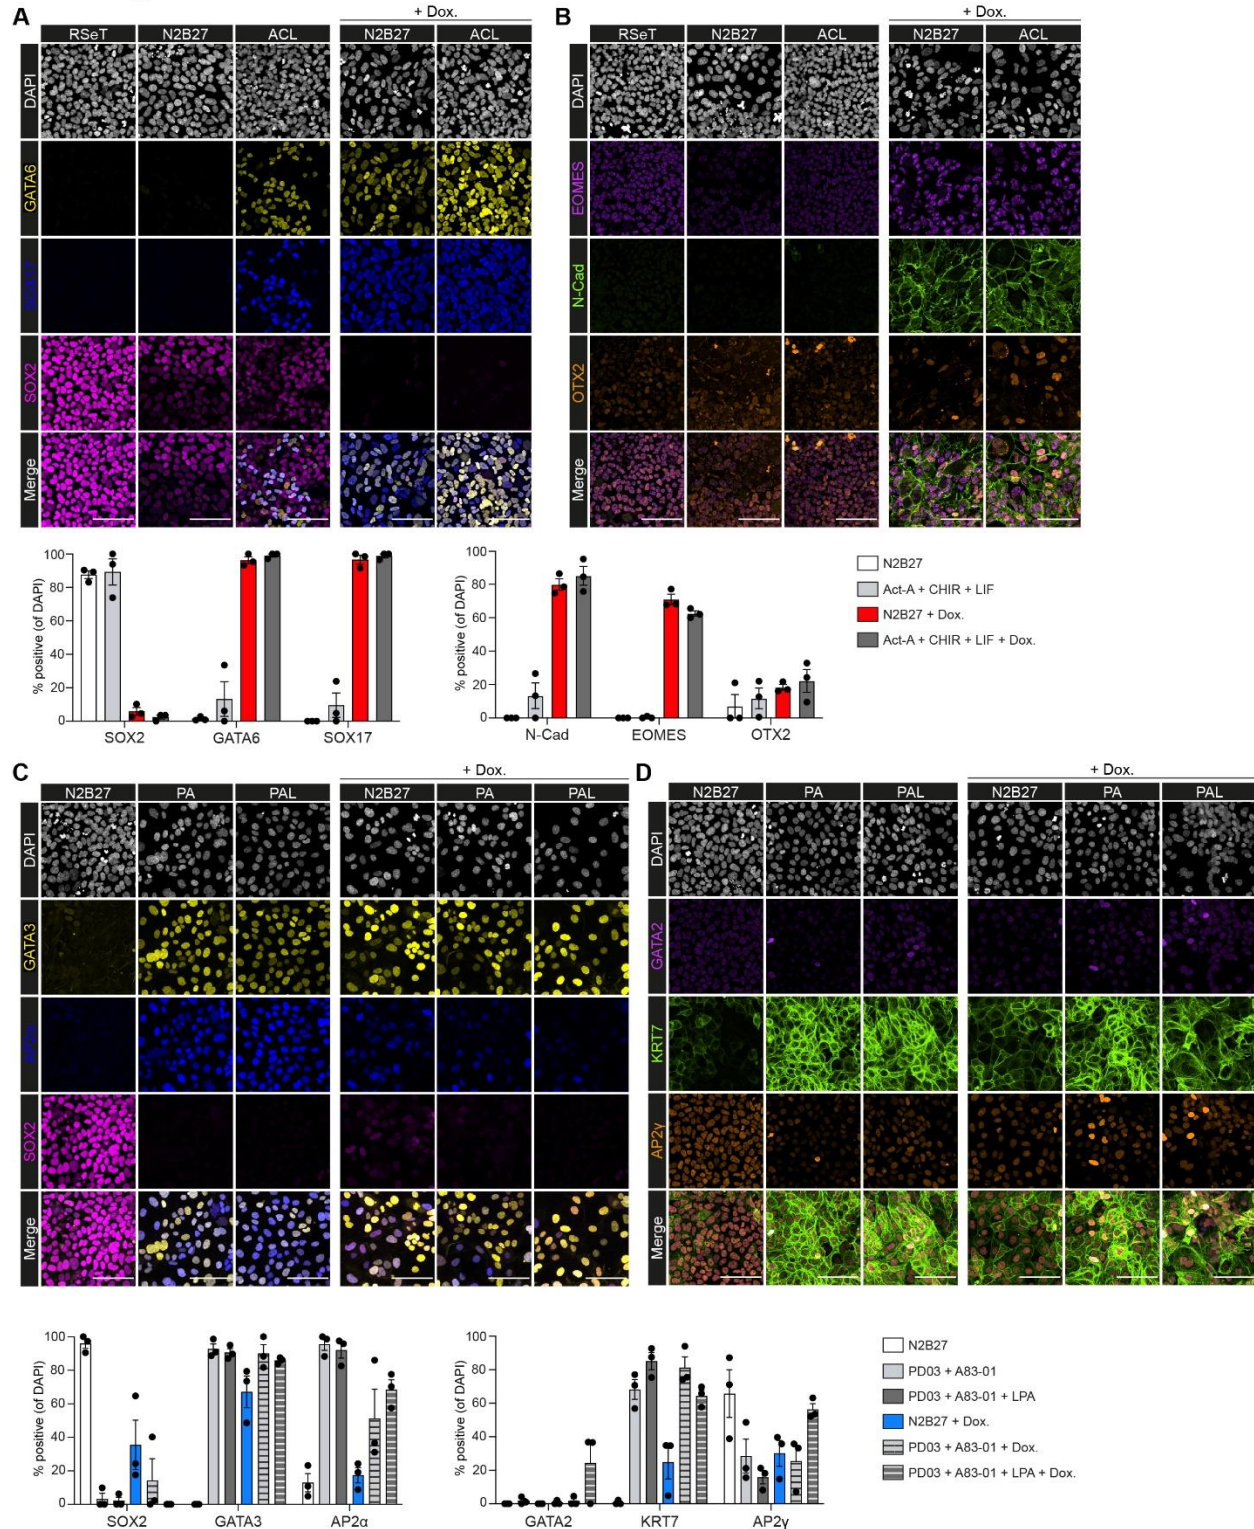

956

957 **Extended Figure 3 (related to Fig 1) – Comparison of TF-mediated induction with published**  
 958 **directed differentiation methods.**

959 (A) Comparison and quantification of GATA6, SOX17 and SOX2 after yolk sac-like cell (Activin-A, CHIR99021 and LIF)  
 960 directed differentiation, doxycycline-mediated induction in inducible GATA6-SOX17 cells or both. Cells were

961 differentiated from RSeT conditions. (B) Comparison and quantification of EOMES, N-Cadherin and OTX2 after yolk-  
962 sac like cell (Activin-A, CHIR99021 and LIF) directed differentiation, doxycycline-mediated induction in inducible  
963 GATA6-SOX17 cells or both. N=2994 cells. (C) Comparison and quantification of GATA3, AP2 $\alpha$  and SOX2 after PA  
964 (PD0325901 and A83-01) or PAL (PD0325901, A83-01 and LPA) directed differentiation, doxycycline-mediated  
965 induction in inducible GATA3-AP2 $\gamma$  cells or both. (D) Comparison and quantification of GATA2, KRT7 and AP2 $\gamma$  after  
966 PA (PD0325901 and A83-01) or PAL (PD0325901, A83-01 and LPA) directed differentiation, doxycycline-mediated  
967 induction in inducible GATA3-AP2 $\gamma$  RSeT cells or both. N=2368 cells. Differentiation was carried out on hESC in RSeT  
968 conditions.  
969

## Extended Figure 4

A

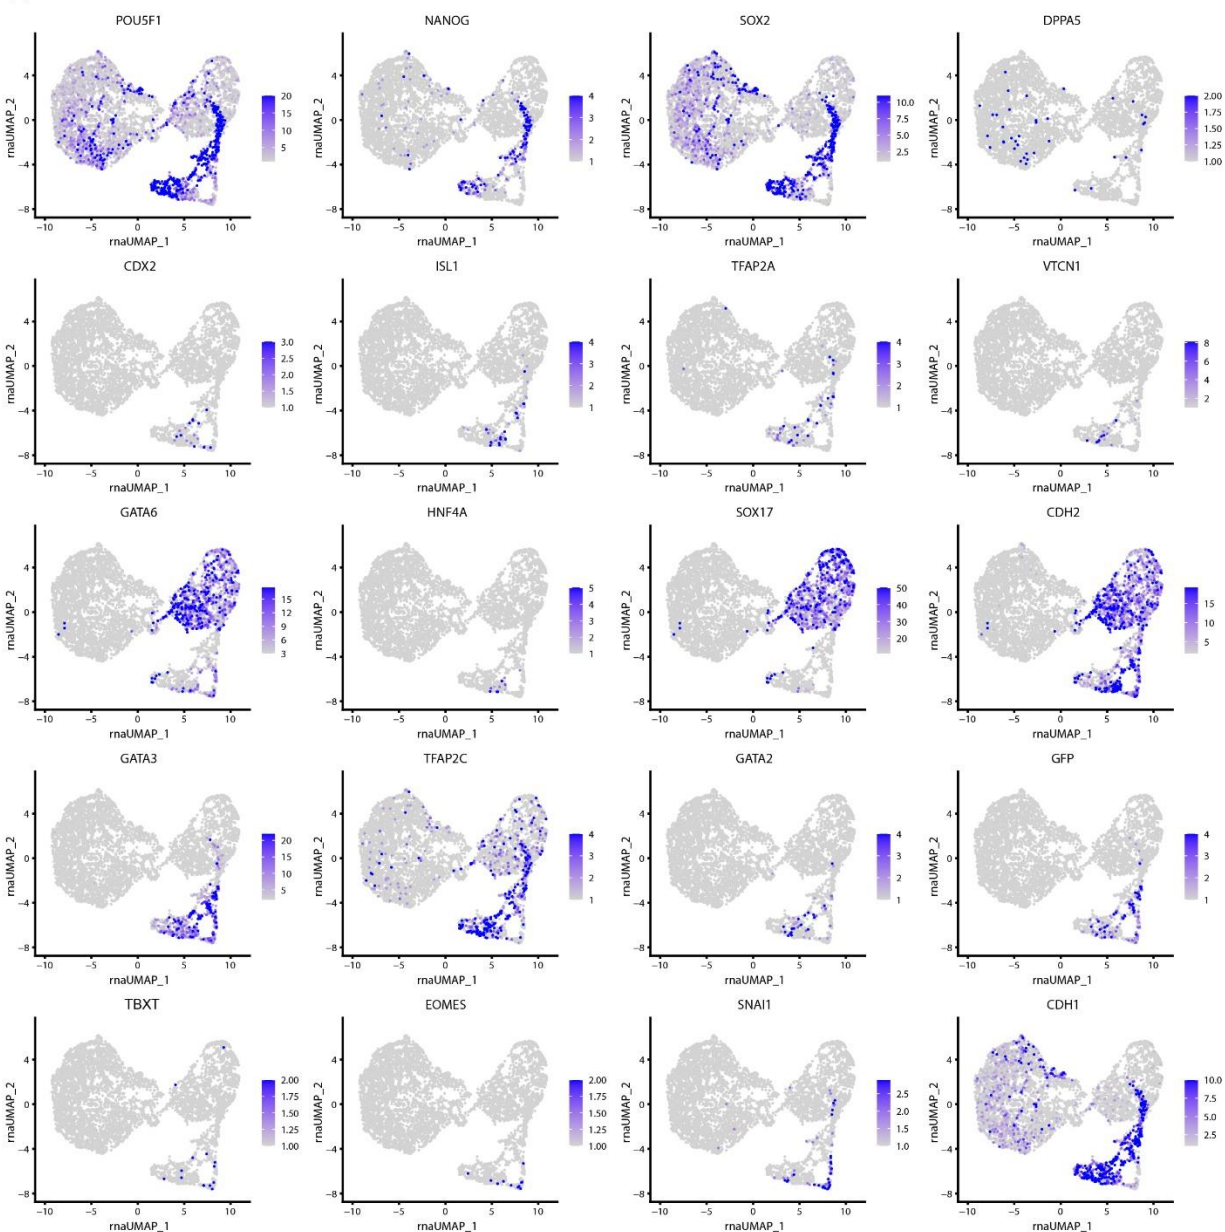

970  
971  
972  
973  
974  
975  
976  
977

### Extended Figure 4 (related to Fig 1) – Expression of cardinal marker genes after three days of induction from RSeT cells.

(A) UMAP projections of selected genes after 3 days of doxycycline-induction from sequencing of wildtype, inducible GATA6-SOX17 and inducible GATA3-AP2 $\gamma$  RSeT hESC populations. Induction was carried out from hESC in RSeT conditions.



## Extended Figure 5

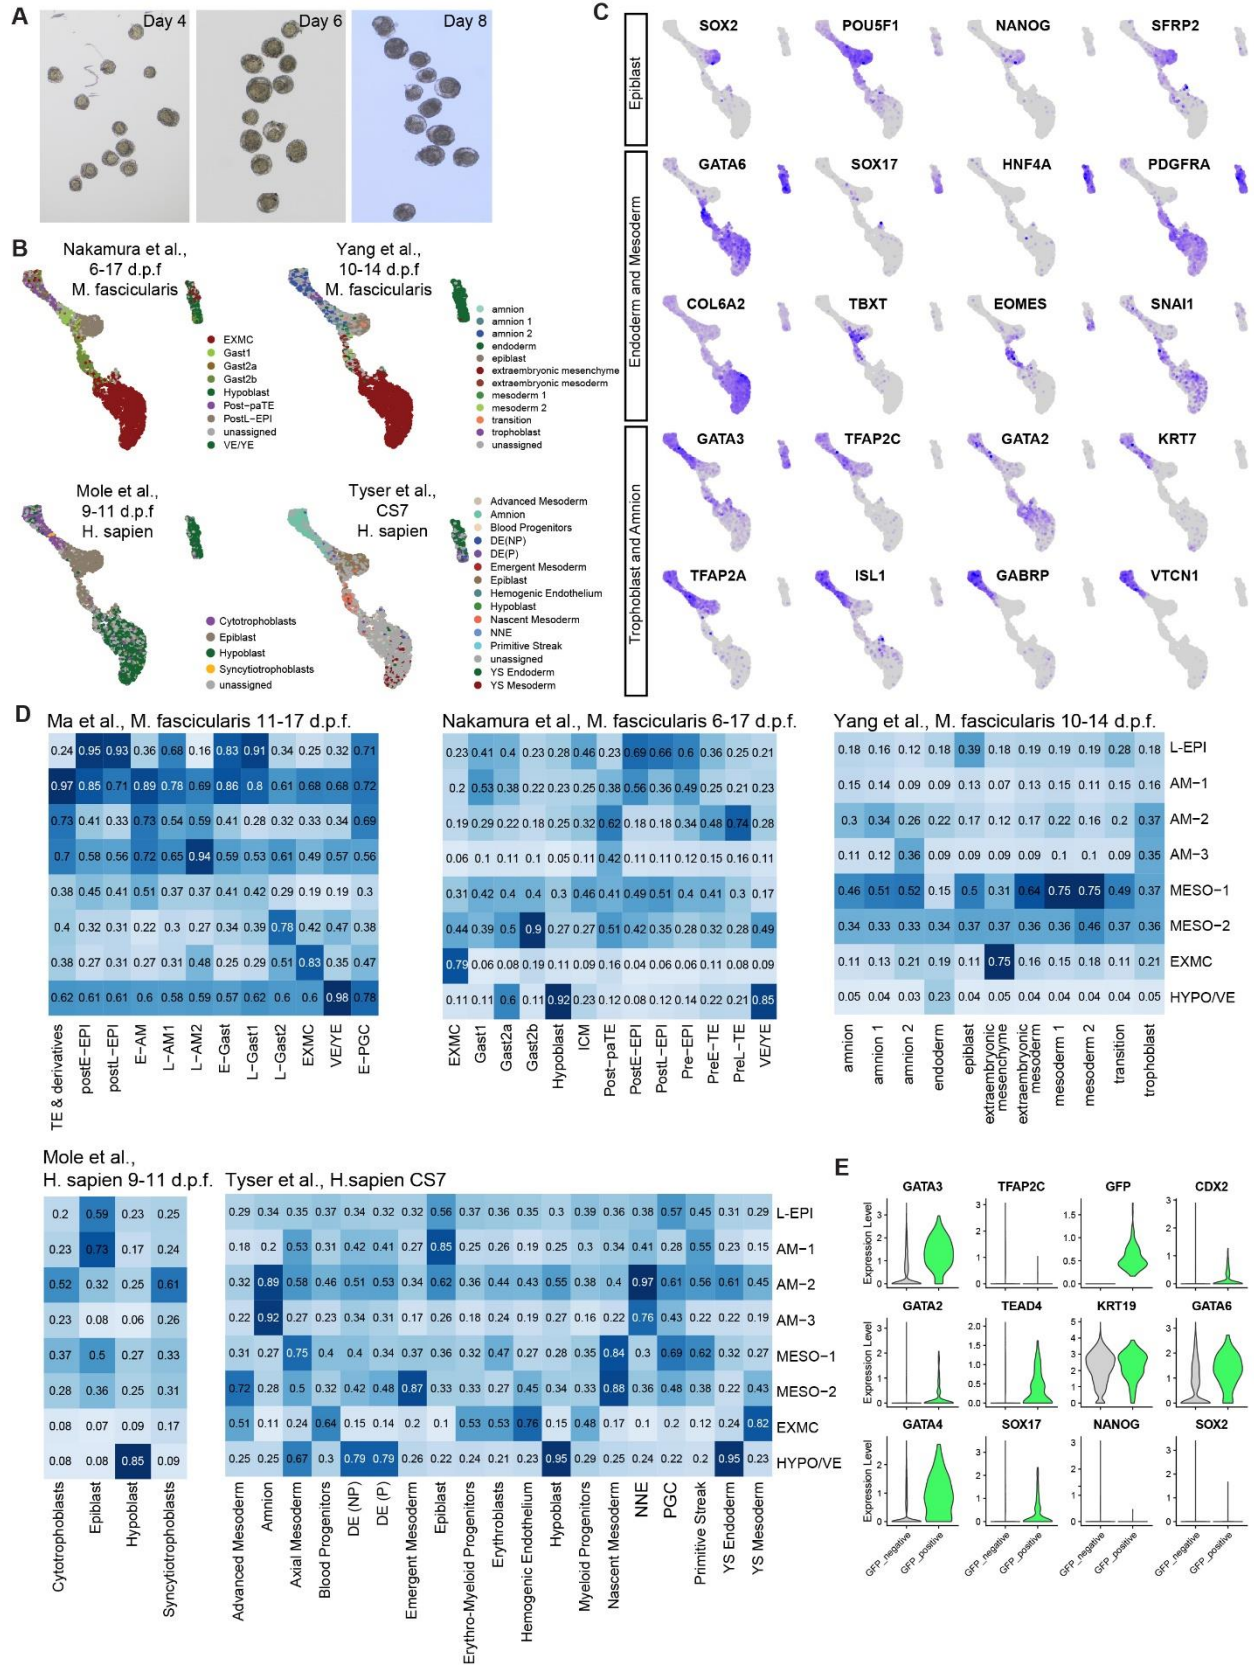

979 **Extended Figure 5 (related to Fig 3) – Post-implantation human model cluster identification**  
980 **and comparison to human and cynomolgus monkey datasets.**

981 (A) Brightfield image of inducible human embryoids selected at days 4, 6 and 8 for sequencing (n=12 at each stage).  
982 Note the presence of an inner domain surrounded by two concentric domains. (B) Cardinal marker gene expression for  
983 Epiblast, Endoderm and Mesoderm, and Trophoblast and Amnion within the stem cell derived model. (C) scmap  
984 projection of inducible human embryoid cells onto cynomolgus macaque (*M. fascicularis*) and human datasets (*H.*  
985 *sapien*) spanning peri-implantation to gastrulation stages. (D) Logistic regression analysis projecting annotated clusters  
986 from cynomolgus macaque (*M. fascicularis*) and human datasets (*H. sapien*) spanning peri-implantation to gastrulation  
987 stages onto post-implantation human embryo model clusters. Cynomolgus data from Ma et al., 2019, Nakamura et al.,  
988 2016, Yang et al., 2021; Human data from Molè et al., 2021 and Tyser et al., 2021. (E) Violin plots of gene expression  
989 in GFP-negative versus GFP-positive cells derived from induced GATA3-AP2γ cells from inducible human embryoid  
990 sequencing dataset.  
991



## Extended Figure 6

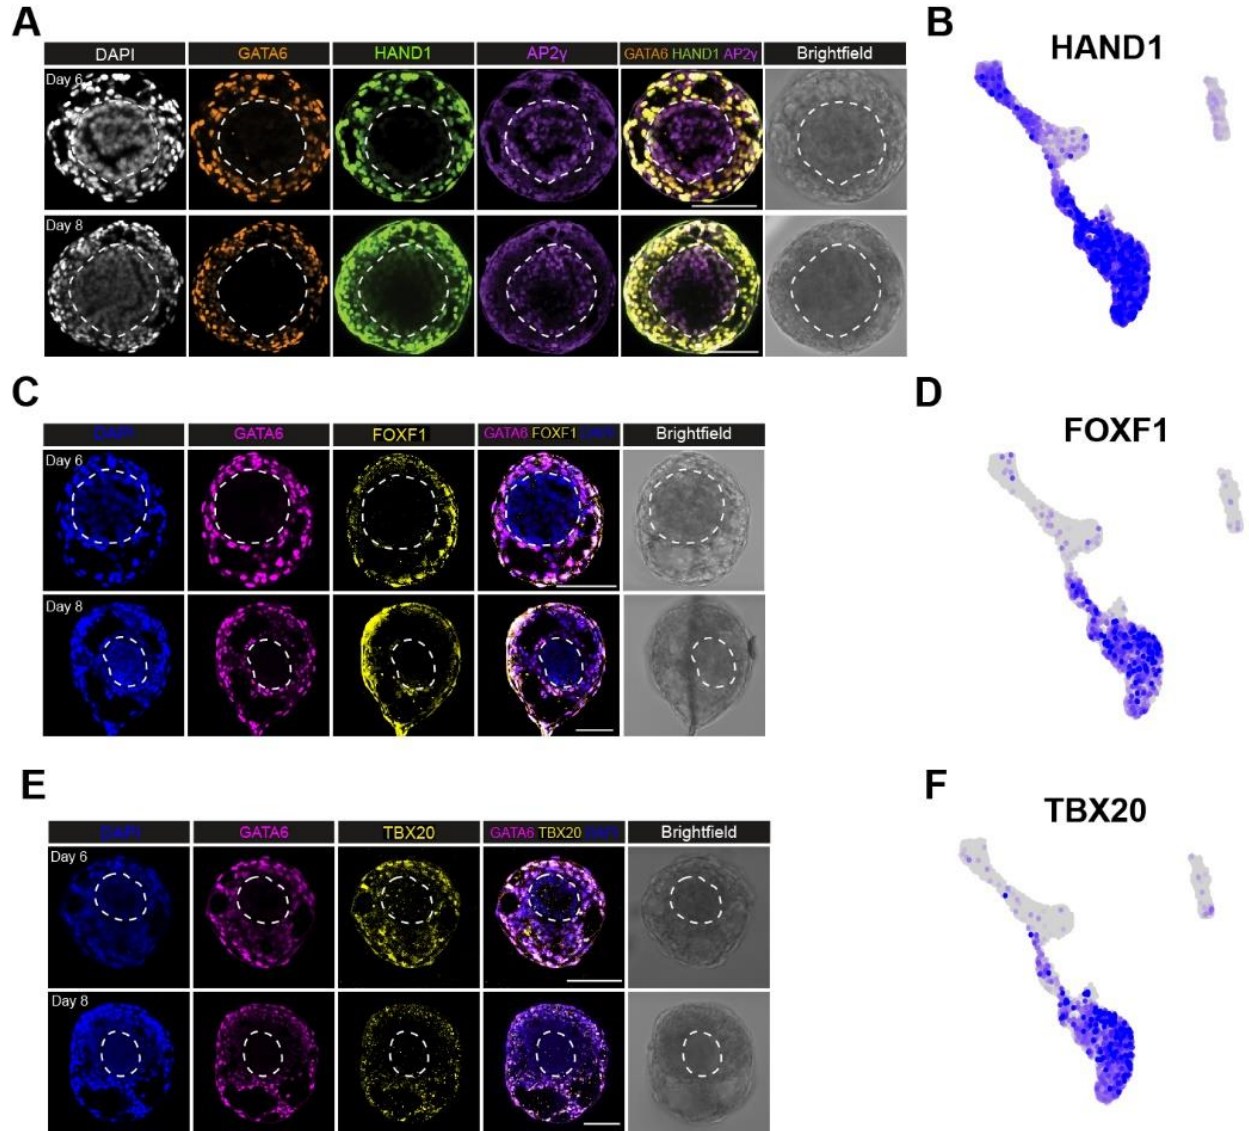

992

993

### Extended Figure 6 (related to Fig 3) – Upregulation of *HAND1* in extraembryonic mesenchyme and amnion trajectories.

994

995 (A) Immunofluorescence of *HAND1* demonstrating expression in GATA6-positive cells (putative extraembryonic

996

997 mesenchyme) and upregulation between days 4 and 6 in putative amnion (*AP2γ*-positive). (B) Expression of *HAND1*

998

999 in the inducible human embryoid single cell sequencing dataset. (C) Immunofluorescence of *FOXF1* demonstrating

1000

1001 high expression in a subset of GATA6-positive cells (putative extraembryonic mesenchyme). (D) Expression of *FOXF1*

1002

1003 in the inducible human embryoid single cell sequencing dataset. (E) Immunofluorescence of *TBX20* demonstrating high

1004

1005 expression in a subset of GATA6-positive cells (putative extraembryonic mesenchyme). (F) Expression of *TBX20* in

1006

1007 the inducible human embryoid single cell sequencing dataset.

1008

1009

1010

## Extended Figure 7

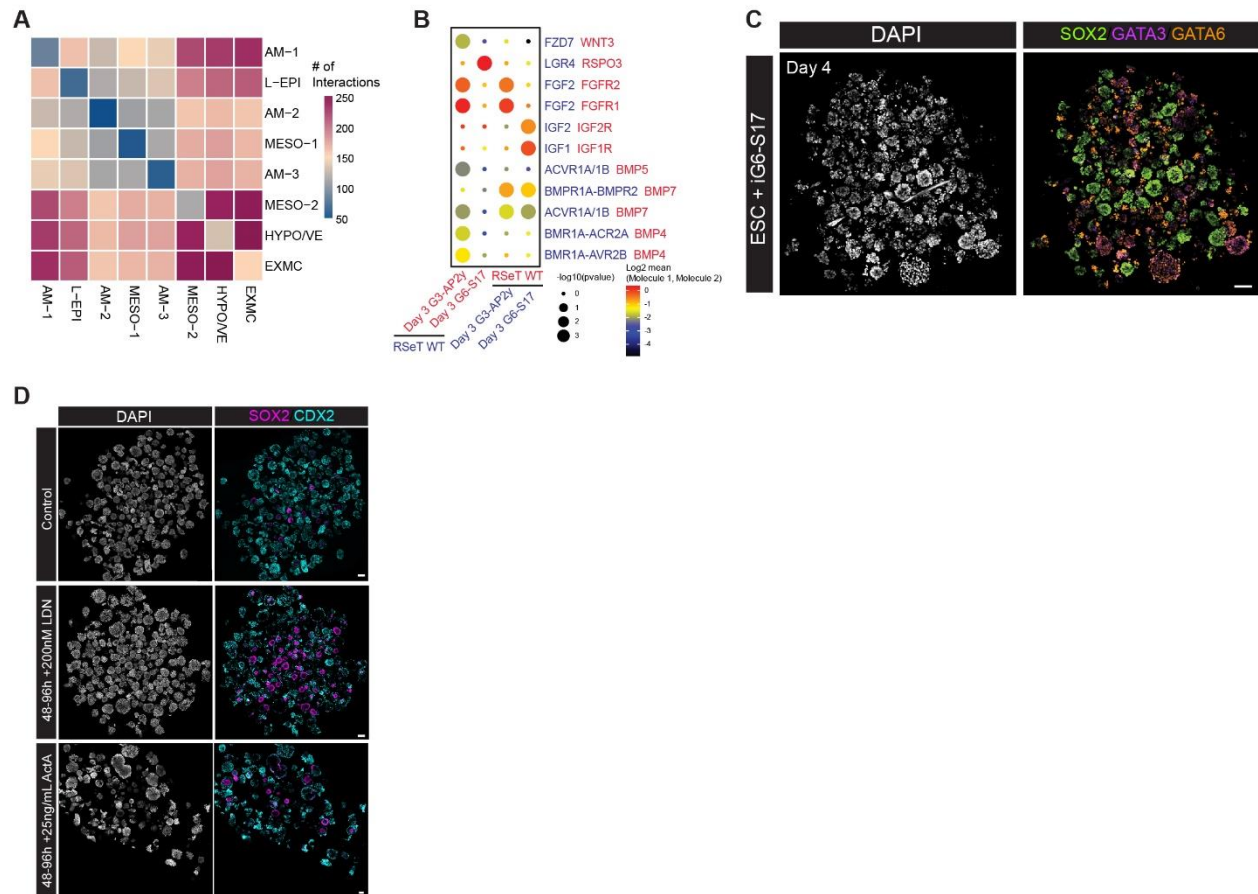

1004  
1005

### 1006 **Extended Figure 7 (related to Fig 4) – Importance of BMP and inducible GATA3-AP2γ cells** 1007 **in generating inducible human embryoids.**

1008 (A) Predicted interaction map between clusters generated with CellPhoneDB. (B) Predicted interactions of inducible  
1009 GATA6-SOX17 (G6-S17) and inducible GATA3-AP2γ (G3-AP2γ) cells after 3 days induction with wildtype RSeT  
1010 hESCs, which are the cell types aggregated to generate inducible human embryoids. (C) Inducible human embryoids  
1011 do not form if induced GATA3-AP2γ cells are excluded. (D) Overview of whole Aggrewells demonstrating the effect of  
1012 BMP inhibition of NODAL activation. Note the significant increase in well-organized structures expressing SOX2 after  
1013 BMP inhibition.

1014  
1015

## Extended Figure 8

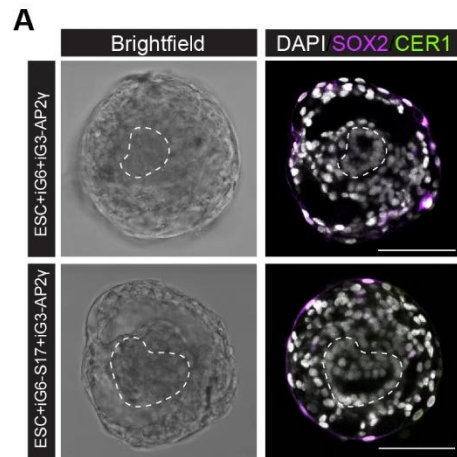

1016

1017

1018

1019

1020

1021

1022

1023

1024

### Extended Figure 8 (related to Fig 5) – CER1 expression is downregulated upon extend culture of inducible human embryoids

(A) Immunofluorescence of CER1 and SOX2 at day 6 post-aggregation demonstrates downregulation of both SOX2 and CER1 at this stage in structures generated with both inducible GATA6 (iG6) or inducible GATA6-SOX17 (iG6-S17) hypoblast-like cells together with wildtype ESCs and inducible GATA3-AP2γ (iG3-AP2γ) cells.

1025 **Extended Table 1: Differentially Expressed Transcripts, Differentially Accessible Motifs,**  
1026 **and Differentially Accessible Peaks between Cell Lines**

1027

1028 **Extended Table 2: Differentially Expressed Transcripts, Differentially Accessible Motifs,**  
1029 **and Differentially Accessible Peaks between inducible Human Embryoid Course Cell**  
1030 **Assignments**
